## **Actin- and microtubule-based motors contribute to clathrin-independent endocytosis in yeast**

Thaddeus K. Woodard<sup>1, †</sup>, Daniel J. Rioux<sup>2, 3, †</sup>, and Derek C. Prosser<sup>2, \*</sup>

<sup>1</sup>Department of Biology, The Johns Hopkins University, Baltimore, Maryland, USA

<sup>2</sup>Department of Biology, Virginia Commonwealth University, 1000 West Cary St., Richmond, Virginia 23238, USA

<sup>3</sup>Life Sciences, Virginia Commonwealth University, Richmond, Virginia, USA

†Authors contributed equally to this work

\*Correspondence: [dprosser@vcu.edu](mailto:dprosser@vcu.edu)

Running Title: Motor protein roles in yeast CIE

Keywords: Endocytosis, clathrin-independent, myosin, dynein, dynactin, actin, microtubule

Word count (main text and figure legends): 7,576

Summary Statement: Clathrin-independent endocytosis is a poorly-understood but conserved process. Here, we provide evidence of a role for myosin and dynein as motor proteins involved the yeast clathrin-independent pathway.

## Abstract

Most eukaryotic cells utilize clathrin-mediated endocytosis as well as multiple clathrin-independent pathways to internalize proteins and membranes. Although clathrin-mediated endocytosis has been studied extensively and many machinery proteins have been identified, clathrin-independent pathways remain poorly characterized by comparison. We previously identified the first known yeast clathrin-independent endocytic pathway, which relies on the actin-modulating GTPase Rho1, the formin Bni1 and unbranched actin filaments, but does not require the clathrin coat or core clathrin machinery proteins. In this study, we sought to better understand clathrin-independent endocytosis in yeast by exploring the role of myosins as actin-based motors, since actin is required for endocytosis in yeast. We find that Myo2, which transports secretory vesicles, organelles and microtubules along actin cables to sites of polarized growth, participates in clathrin-independent endocytosis. Unexpectedly, the ability of Myo2 to transport microtubule plus ends to the cell cortex appears to be required for its role in clathrin-independent endocytosis. In addition, dynein, dynactin and proteins involved in cortical microtubule capture are also required. Thus, our results suggest that interplay between actin and microtubules contributes to clathrin-independent internalization in yeast.

## 1 **Introduction**

2 In eukaryotic cells, the plasma membrane (PM) plays important roles in regulation of signal  
3 transduction, communication with the extracellular environment, and nutrient uptake.

4 Maintenance of PM composition and function relies on a balance between exocytosis for  
5 delivery of membrane and proteins and on endocytosis for their internalization and removal from  
6 the cell surface. Exocytic and endocytic transport allow the cell to control the complement of  
7 proteins at the PM in order to amplify or attenuate responses to external cues, and permit  
8 selective uptake of nutrients by regulating surface availability of transporters. Additionally,  
9 endocytosis plays important quality control functions in mediating removal of damaged proteins  
10 through internalization and targeting to the lysosome for degradation.

11 Endocytic mechanisms have been studied extensively for over sixty years, where electron  
12 microscopy studies observed “bristle-coated” structures that were later identified as clathrin-  
13 coated pits and vesicles (Kanaseki and Kadota, 1969; Pearse, 1975; Roth and Porter, 1964).  
14 Subsequent studies have characterized clathrin-mediated endocytosis (CME) as the predominant  
15 pathway for internalization in most eukaryotic cells (Kaksonen and Roux, 2018). CME is highly  
16 conserved from yeast to human, and involves the action of more than 40 distinct proteins that  
17 arrive in a highly ordered sequence of events in order to select and concentrate cargo at sites of  
18 vesicle formation (Kaksonen et al., 2003; Kaksonen et al., 2005; Taylor et al., 2011). These  
19 proteins act in modules that correspond to discrete stages of clathrin-coated vesicle (CCV)  
20 formation, beginning with an initiation phase in which adaptor proteins bind to endocytic cargos  
21 at the PM as well as the assembling clathrin coat, effectively concentrating the cargo at a site of  
22 CCV formation (Howard et al., 2002; Maldonado-Báez et al., 2008; Newpher et al., 2005; Reider  
23 and Wendland, 2011; Reider et al., 2009). As the clathrin-coated site matures, endocytic  
24 accessory and scaffolding proteins facilitate additional clathrin assembly, and recruit proteins  
25 involved in later stages of vesicle formation, including actin-nucleating proteins in yeast required  
26 for the force generation needed for membrane invagination (Kaksonen et al., 2003; Kaksonen et  
27 al., 2005; Sun et al., 2006). In the late stages of CME, scission effectors such as dynamin and  
28 amphiphysins assist with membrane constriction at the neck of the budding vesicle, leading to  
29 separation of the CCV from the cell surface (Bliek et al., 1993; Damke et al., 1994; Kaksonen et  
30 al., 2005). Finally, uncoating of the CCV permits recycling of endocytic machinery proteins and  
31 fusion of the vesicle with downstream compartments (Ungewickell et al., 1995). Studies have

32 shown that the modular nature of CME is well conserved, and genetic or pharmacological  
33 perturbation of any stage in the process can reduce the efficiency of cargo internalization (Goode  
34 et al., 2015; Kaksonen and Roux, 2018).

35 Early studies of endocytosis also observed vesicle formation in the absence of a bristle coat  
36 (Anderson and Batten, 1983; Morris and Saelinger, 1983), suggesting that multiple mechanisms  
37 for internalization likely existed. Indeed, numerous clathrin-independent endocytic (CIE)  
38 pathways have been identified across eukaryotes. These include a variety of mechanistically  
39 distinct routes of internalization. For example, CIE encompasses phagocytic and macropinocytic  
40 pathways that rely on membrane protrusion or ruffling, lipid (typically cholesterol)-enriched  
41 membrane microdomains such as caveolae and clathrin-independent carriers and GPI-enriched  
42 endocytic compartments (CLIC/GEEC), and actin-dependent pathways relying on Arf- and Rho-  
43 family small GTPases (Howes et al., 2010; Lamaze et al., 2001; Mayor et al., 2014;  
44 Radhakrishna et al., 1996; Sabharanjak et al., 2002; Sharma et al., 2002). In addition, recent  
45 studies have demonstrated that ultrafast endocytosis at synaptic terminals is clathrin-  
46 independent, and fast endophilin-mediated endocytosis (FEME) is a distinct CIE pathway that  
47 relies on Endophilin A1, dynein and microtubules for internalization of PM proteins (Boucrot et  
48 al., 2015; Casamento and Boucrot, 2020; Watanabe et al., 2013a; Watanabe et al., 2013b).  
49 Despite the variety of CIE pathways that have been documented, our current understanding of  
50 the molecular mechanisms governing any CIE pathway is poor in comparison to that of CME.  
51 Reasons for this disparity may include the comparative lack of cargos that utilize CIE pathways  
52 for entry, and a lack of genetically tractable model systems for studies of CIE.

53 We previously identified the first-known *Saccharomyces cerevisiae* CIE pathway using a  
54 mutant strain lacking four monomeric clathrin-binding adaptor proteins: the epsins Ent1 and  
55 Ent2, and the AP180/PICALM homologs Yap1801 and Yap1802 (Prosser et al., 2011). Yeast  
56 lacking these adaptors (*ent1Δ ent2Δ yap1801Δ yap1802Δ*, also known as 4Δ) have defective  
57 CME as seen by retention of endocytic cargos at the PM, while any one full-length adaptor is  
58 sufficient for endocytosis (Maldonado-Báez et al., 2008). Although *ENT1* and *ENT2* constitute  
59 an essential gene pair, expression of the phosphatidylinositol (4,5)-bisphosphate [PI(4,5)P<sub>2</sub>]-  
60 binding epsin N-terminal homology (ENTH domain) of either gene is sufficient for viability but  
61 not for their role in CME (Aguilar et al., 2006; Maldonado-Báez et al., 2008; Wendland et al.,  
62 1999). Thus, 4Δ+ENTH1 cells expressing the ENTH domain of Ent1 have been a useful model

63 for studying deficits in CME (Maldonado-Báez et al., 2008; Prosser et al., 2011). Using this  
64 strain to identify genes whose overexpression restored endocytic cargo internalization, we found  
65 that high-copy expression of the cell wall stress sensor *MID2*, the Rho1 guanine nucleotide  
66 exchange factor *ROM1* and the actin-modulating small GTPase *RHO1* all enhanced  
67 internalization of multiple endocytic cargos, and that their function did not require clathrin or the  
68 major CME machinery proteins (Prosser and Wendland, 2012; Prosser et al., 2011). The budding  
69 yeast CIE pathway additionally requires the formin Bni1, which generates unbranched actin  
70 filaments independent of Arp2/3, proteins in the polarisome complex which recruits and  
71 activates Bni1 at sites of polarized growth, and proteins that stabilize unbranched actin filaments  
72 such as the tropomyosins Tpm1 and Tpm2. Further studies identified  $\alpha$ -arrestins as cargo-  
73 selective proteins that participate in CIE through mechanisms that are distinct from their  
74 established roles in CME, as well as a dual role for the early-acting CME protein Syp1,  
75 suggesting that some proteins may contribute to multiple endocytic pathways (Apel et al., 2017;  
76 Prosser et al., 2015).

77 Although yeast were thought to rely solely upon CME prior to our identification of the Rho1-  
78 dependent CIE pathway, other studies have also suggested that yeast do not strictly require CME  
79 for cargo internalization. For example, *Candida albicans* can perform endocytosis in the absence  
80 of functional clathrin and Arp2/3 (Epp et al., 2010; Epp et al., 2013), while endocytosis at the  
81 cylindrical sides of cells in the fission yeast *Schizosaccharomyces pombe* appears to depend on  
82 the formin For3 (Gachet and Hyams, 2005). Overall, our mechanistic understanding of CIE  
83 pathways in yeast, and indeed in any eukaryotic cell type, lags considerably behind that of CME  
84 due at least in part to a lack of tools to characterize these pathways.

85 In this study, we extend our earlier findings by expanding the set of proteins required for CIE  
86 in yeast. Since all endocytosis in yeast critically depends on actin polymerization, we specifically  
87 focused on roles for myosins as actin-based motors and on myosin-interacting proteins. We find  
88 that Myo2, which transports organelles and other cellular structures along actin cables to sites of  
89 polarized growth, is required for CIE. Unexpectedly, Myo2-dependent transport of microtubule  
90 plus ends, as well as dynein, dynactin, and proteins involved in cortical microtubule capture  
91 participate in CIE, while transport of other structures is dispensable. Thus, interplay between  
92 actin and microtubule cytoskeletons may play important roles in yeast CIE.

## 93 **Results**

### 94 *The type V myosin Myo2 is required for clathrin-independent endocytosis*

95 Our previous studies of CIE demonstrated a requirement for the formin Bni1, which localizes  
96 mainly to the bud tip and bud neck, where it promotes actin elongation at the barbed end of  
97 unbranched filaments (Evangelista et al., 2001; Prosser et al., 2011; Pruyne et al., 2002; Sagot et  
98 al., 2002). Additionally, we found that the tropomyosin Tpm1, which stabilizes unbranched actin  
99 filaments, was necessary for CIE. These filaments are bundled into actin cables that serve as  
100 tracks for myosin-dependent delivery of material to sites of polarized growth (Pruyne et al.,  
101 1998). Our initial findings underscored the role of actin in CIE, and prompted us to examine the  
102 contribution of myosins as actin-based motors. Budding yeast possess five myosins: the type I  
103 myosins Myo3 and Myo5 are involved in CME, the type II myosin Myo1 is involved in  
104 constriction of the cytokinetic ring at the bud neck, and the type V myosins Myo2 and Myo4  
105 transport proteins, vesicles, organelles, and mRNA along actin cables (Bobola et al., 1996; Geli  
106 and Riezman, 1996; Pruyne et al., 2004; Watts et al., 1987). Of these, Myo2 appears to play the  
107 most prominent role in transport along unbranched actin cables; thus, we focused on this protein  
108 as a candidate motor involved in CIE.

109 *MYO2* is an essential gene, and thus cannot be deleted (Johnston et al., 1991). Instead, we  
110 generated *myo2* mutants with reduced processivity (Schott et al., 1999; Schott et al., 2002). The  
111 lever arms of Myo2 permit movement along actin filaments, and contain IQ repeats that can be  
112 truncated to generate motors that take shorter “steps”. Using full-length (6IQ) or truncated (4IQ  
113 or 2IQ) mutants expressed as the sole source of Myo2 in WT, 4 $\Delta$ +Ent1 (with functional CME)  
114 and 4 $\Delta$ +ENTH1 (with impaired CME) backgrounds, we examined localization of the pheromone  
115 receptor Ste3-GFP as an endocytic cargo. Ste3 is a seven-transmembrane receptor that is  
116 normally transported to the PM in haploid *MAT $\alpha$*  cells, constitutively internalized via CME, and  
117 delivered to the vacuole for degradation (Davis et al., 1993). Under conditions where CME is  
118 blocked, Ste3 is instead largely retained at the PM, with reduced transport to the vacuole  
119 (Maldonado-Báez et al., 2008). We previously found that expression of *ROMI* from a high-copy  
120 plasmid promoted clathrin-independent internalization of Ste3-GFP in numerous CME-deficient  
121 mutants including 4 $\Delta$ +ENTH1 (Prosser et al., 2011); thus, we asked whether a reduction in  
122 Myo2 processivity would impair *ROMI*-dependent activation of CIE. In WT and 4 $\Delta$ +Ent1  
123 backgrounds transformed with empty vector, expression of Myo2<sup>6IQ</sup>, Myo2<sup>4IQ</sup>, or Myo2<sup>2IQ</sup>

124 resulted in Ste3-GFP localization primarily at the vacuole (Fig. 1A). Thus, reduced Myo2  
125 processivity does not appear to affect CME. In contrast, Ste3-GFP showed increased retention at  
126 the PM in 4Δ+ENTH1 cells transformed with empty vector and expressing full-length and  
127 truncated Myo2, which is consistent with defective endocytosis in 4Δ+ENTH1 cells. When these  
128 4Δ+ENTH1 cells were instead transformed with high-copy *ROM1* to promote CIE, we found that  
129 Ste3-GFP internalization and transport to the vacuole was improved in cells expressing full-  
130 length Myo2<sup>6IQ</sup>, but showed less or no improvement in cells expressing Myo2<sup>4IQ</sup> or Myo2<sup>2IQ</sup>  
131 compared to equivalent empty vector-transformed cells.

132 We previously developed a quantitative method for assessing endocytic capacity in live yeast  
133 cells by tagging the cytoplasmic tail of cargo proteins with superecliptic pHluorin, a pH-sensitive  
134 variant of GFP (Miesenböck et al., 1998; Prosser et al., 2010; Prosser et al., 2016;  
135 Sankaranarayanan et al., 2000). When the tail of the cargo is exposed to a neutral environment  
136 such as the cytoplasm, the pHluorin tag is brightly fluorescent. In contrast, fluorescence is  
137 quenched upon packaging of the tag into acidic environments, such as the intraluminal vesicles  
138 within multivesicular bodies or the vacuole lumen. Measurement of steady-state, whole-cell  
139 Ste3-pHluorin intensity can thus reveal changes in endocytosis, as cells that efficiently  
140 internalize Ste3-pHluorin and target it to the vacuole are dim, while cells with defective  
141 endocytosis retain the tagged protein at the PM and are comparatively bright (Prosser et al.,  
142 2010; Prosser et al., 2016). Using the same truncated Myo2 strains expressing genomically-  
143 tagged Ste3-pHluorin instead of GFP, we were able to quantitatively assess the effect of reduced  
144 Myo2 processivity on CIE. As expected for cells with defective CME, Ste3-pHluorin intensity in  
145 empty vector-transformed 4Δ+ENTH1 cells expressing full-length Myo2<sup>6IQ</sup> or truncated Myo2<sup>4IQ</sup>  
146 or Myo2<sup>2IQ</sup> was significantly brighter than in the equivalent WT and 4Δ+Ent1 backgrounds (Fig.  
147 1B-D). In Myo2<sup>6IQ</sup>-expressing 4Δ+ENTH1 cells, transformation with high-copy *ROM1* partially  
148 restored Ste3-pHluorin internalization, as shown by a significant reduction in fluorescence  
149 intensity compared to the same cells with empty vector (Fig. 1B). In contrast, high-copy *ROM1*  
150 failed to improve Ste3-pHluorin internalization in 4Δ+ENTH1 cells expressing Myo2<sup>4IQ</sup> (Fig.  
151 1C) or Myo2<sup>2IQ</sup> (Fig. 1D), as these cells remained as bright as, or brighter than, equivalent empty  
152 vector-transformed cells. Taken together, these data suggest that Myo2 processivity is required  
153 for CIE in yeast.

154 To examine the potential contribution of other myosins to CIE, we generated single *myo1Δ*  
155 and *myo4Δ* deletions in WT, 4Δ+Ent1 and 4Δ+ENTH1 backgrounds expressing Ste3-GFP. Both  
156 *myo1Δ* and *myo4Δ* did not alter vacuolar Ste3-GFP localization in WT and 4Δ+Ent1  
157 backgrounds transformed with empty vector, suggesting that neither gene is required for cargo  
158 internalization when CME is functional (Supplementary Fig. S1A-B). Whereas Ste3-GFP was  
159 partially retained at the PM in empty vector-transformed *myo1Δ* or *myo4Δ* 4Δ+ENTH1 cells,  
160 transformation with high-copy *ROM1* reduced cell surface retention and increased vacuole  
161 localization in both cases, suggesting that neither Myo1 nor Myo4 is required for CIE.

162 Since Myo3 and Myo5 play overlapping roles in force generation at cortical actin patches in  
163 yeast, deletion of both genes simultaneously is required to block CME (Geli and Riezman,  
164 1996). Consistent with this finding, *myo3Δ myo5Δ* cells transformed with empty vector showed a  
165 severe retention of Ste3-GFP at the plasma membrane, with cargo fluorescence virtually  
166 undetectable in the vacuole (Supplementary Fig. S1C-D). This defect could be complemented by  
167 low-copy expression of *MYO5*, which restored vacuolar Ste3-GFP localization and reduced cell  
168 surface retention of the cargo. In contrast, high-copy *YAP1801*, which restored endocytosis in  
169 4Δ+ENTH1 cells, had no effect on cargo internalization in *myo3Δ myo5Δ* (Prosser et al., 2011).  
170 Although we predicted that high-copy *ROM1* would promote CIE in *myo3Δ myo5Δ* cells since  
171 these myosins are known to function in CME, we unexpectedly found that Ste3-GFP was  
172 strongly retained at the PM. However, close examination of these cells revealed dim vacuolar  
173 fluorescence with high-copy *ROM1*, but not in cells transformed with empty vector or *YAP1801*  
174 (Supplementary Fig. 1C-D). The limited ability of Rom1 to promote Ste3 internalization in  
175 *myo3Δ myo5Δ* cells might be explained by previous studies showing that actin cable morphology  
176 is severely altered in this strain (Anderson et al., 1998; Goodson et al., 1996). Indeed, phalloidin  
177 staining of *myo3Δ myo5Δ* cells with empty vector revealed numerous actin patches, but no  
178 obvious actin cable structures (Supplementary Fig. 1E). While low-copy *MYO5* restored actin  
179 cables, they remained absent in cells with high-copy *YAP1801* or *ROM1*. Thus, Myo3 and Myo5  
180 may play roles in CIE, but their role might be explained by an indirect effect on actin cable  
181 morphology. Taken together, these data suggest that Myo2 processivity contributes to CIE, while  
182 other myosins may play less prominent roles.

183

184



185 *Myo2-dependent transport of microtubules is required for CIE*

186 Previous studies showed that Myo2 plays a critical role in mother-to-bud transport of  
187 secretory vesicles, mitochondria, vacuoles, peroxisomes, and microtubules (Beach et al., 2000;  
188 Boldogh et al., 2004; Fagarasanu et al., 2005; Fagarasanu et al., 2009; Ishikawa et al., 2003;  
189 Pruyne et al., 1998; Schott et al., 1999). To achieve this, the cargo-binding domain (CBD) of  
190 Myo2 interacts with organelle-specific adaptors that link each structure to the motor for transport  
191 (Eves et al., 2012; Fagarasanu et al., 2009; Jin et al., 2011; Lipatova et al., 2008; Pashkova et al.,  
192 2006). Structure-function analysis of the CBD revealed unique surface patches that associate  
193 with Myo2 adaptors, and mutations within these patches result in selective loss of adaptor  
194 binding and organelle transport (Eves et al., 2012; Pashkova et al., 2006). To assess which  
195 functions are necessary for CIE, we expressed CBD mutants from the endogenous *MYO2* locus  
196 as the sole source of Myo2 in WT, 4 $\Delta$ +Ent1 and 4 $\Delta$ +ENTH1 backgrounds. We focused on five  
197 point mutants, each defective in one transport function: D1297N (loss of Vac17 binding and  
198 vacuole transport); K1312A (loss of Mmr1 binding and mitochondrial transport); K1408A (loss  
199 of Kar9 binding and microtubule plus end transport); Q1447R (deficient in binding the Rab  
200 GTPases Ypt31, Ypt32, Ypt11 and Sec4, reduction in secretory vesicle transport); and E1484A  
201 (loss of Inp2 binding and peroxisome transport; (Eves et al., 2012; Fagarasanu et al., 2009;  
202 Ishikawa et al., 2003; Lipatova et al., 2008; Pashkova et al., 2006)). As seen in Fig. 2A,  
203 expression of any of these mutants in WT or 4 $\Delta$ +Ent1 cells transformed with empty vector did  
204 not alter vacuolar localization of Ste3-GFP compared to cells with wild-type Myo2, suggesting  
205 that none of these Myo2 functions impact CME. As expected for 4 $\Delta$ +ENTH1 cells expressing  
206 Myo2 CBD mutants and transformed with empty vector, Ste3-GFP showed retention at the PM.  
207 Expression of high-copy *ROM1* improved Ste3-GFP internalization and vacuolar delivery in  
208 4 $\Delta$ +ENTH1 cells expressing wild-type Myo2 and all of the CBD mutants except for except for  
209 the microtubule transport-deficient mutant, Myo2<sup>K1408A</sup>.

210 When we analyzed endocytic capacity in the same set of strains expressing Ste3-pHluorin,  
211 we observed quantitative trends that agreed with localization patterns of Ste3-GFP (Fig. 2B-G).  
212 In WT and 4 $\Delta$ +Ent1 backgrounds with functional CME, whole-cell intensity of Ste3-pHluorin  
213 was similarly low regardless of whether the cells expressed wild-type Myo2 or any of the CBD  
214 mutants. Ste3-pHluorin intensity was significantly higher in all empty vector-transformed  
215 4 $\Delta$ +ENTH1 strains compared to their Myo2 CBD-matched control WT and 4 $\Delta$ +Ent1

216 background strains, as expected for cells with defective CME. Transformation of 4Δ+ENTH1  
217 cells expressing wild-type Myo2 or the D1297N, K1312A, Q1447R, or E1484A CBD mutants  
218 significantly improved Ste3-pHluorin internalization, as seen by lower fluorescence intensity  
219 compared to empty vector-transformed 4Δ+ENTH1 cells (Fig. 2B-D and F-G). In contrast,  
220 Myo2<sup>K1408A</sup> 4Δ+ENTH1 cells transformed with high-copy *ROM1* were significantly *brighter*  
221 than empty vector-transformed cells, suggesting a possible worsening of the endocytic defect  
222 (Fig. 2E). Interestingly, high-copy *ROM1* showed varying degrees of rescue in the other CBD  
223 mutants: it fully rescued Ste3-pHluorin internalization to WT or 4Δ+Ent1 levels in cells  
224 expressing Myo2 WT, D1297N and Q1447R, but only partially improved internalization to  
225 levels that remained higher than for WT or 4Δ+Ent1 in cells expressing Myo2<sup>K1312A</sup> or  
226 Myo2<sup>E1484A</sup>. Overall, the ability of Myo2 to transport microtubule plus ends appears to be  
227 required for CIE, while other motor functions appear to be dispensable.

228

### 229 *Links between Myo2 and microtubule plus ends are required for CIE*

230 Our finding that microtubule plus end transport contributes to CIE was unexpected because  
231 the yeast microtubule cytoskeleton is thought to play limited roles in membrane traffic; however,  
232 a previous study implicated microtubules and the plus-end tracking protein Bik1 in trafficking of  
233 the v-SNARE Snc1 (Boscheron et al., 2016). *tub1-Glu* and *bik1Δ* mutations caused Snc1  
234 mislocalization reminiscent of defective endocytosis that were suppressed by Rho1 activation;  
235 thus, we further examined links between Myo2 and microtubule plus end-binding proteins. The  
236 Myo2 CBD binds Kar9, the yeast homolog of adenomatous polyposis coli (APC; (Beach et al.,  
237 2000)). In turn, Kar9 associates with the plus end-binding protein Bim1, which is homologous to  
238 mammalian EB1. Myo2, Kar9 and Bim1 function together in a pathway required for cortical  
239 microtubule (cMT) capture which is partially redundant with a second pathway involving  
240 dynein, Bik1 (homolog of CLIP-170) and Num1 (Adames and Cooper, 2000; Farkasovsky and  
241 Küntzel, 2001; Lee et al., 2000; Miller and Rose, 1998; Miller et al., 2000; Yin et al., 2000).  
242 Kar9 and Bim1 both additionally associate with Bik1, suggesting the possibility of cross-talk  
243 between these pathways (Moore et al., 2006).

244 To begin examining the role of these plus end-binding proteins in CIE, we generated *kar9Δ*,  
245 *bim1Δ* and *bik1Δ* mutants in WT, 4Δ+Ent1 and 4Δ+ENTH1 backgrounds expressing Ste3-GFP  
246 or Ste3-pHluorin. Each of the plus end transport-regulating proteins did not alter vacuolar

247 delivery of Ste3-GFP in empty vector-transformed WT and 4Δ+Ent1 backgrounds compared to  
248 equivalent cells with no modification to plus end-binding genes (Fig. 3A). As expected, Ste3-  
249 GFP was partially retained at the PM in 4Δ+ENTH1 cells as well as *kar9Δ*, *bim1Δ*, and *bik1Δ*  
250 4Δ+ENTH1 cells with empty vector. High-copy *ROM1* appeared to improve Ste3-GFP  
251 internalization in 4Δ+ENTH1 and *bik1Δ* 4Δ+ENTH1 cells, but had little effect in *kar9Δ* or  
252 *bim1Δ* 4Δ+ENTH1 cells. When we quantified Ste3-pHluorin intensity in these backgrounds, we  
253 found that WT and 4Δ+Ent1 backgrounds were similarly dim in each case, while 4Δ+ENTH1  
254 backgrounds were significantly brighter in comparison (Fig. 3B-E). In 4Δ+ENTH1 cells with no  
255 modification to plus-end binding genes, high-copy *ROM1* fully restored Ste3-pHluorin  
256 internalization to WT or 4Δ+Ent1 levels (Fig. 3B). In contrast, high-copy *ROM1* did not reduce  
257 Ste3-pHluorin intensity in *kar9Δ* 4Δ+ENTH1 cells compared to empty vector, suggesting that  
258 the plus end-binding complex is required for CIE (Fig. 3C). Ste3-pHluorin internalization was  
259 partially restored in *bim1Δ* and *bik1Δ* 4Δ+ENTH1 cells with high-copy *ROM1*, where  
260 fluorescence intensity was significantly lower than cells with empty vector, suggesting that  
261 neither gene is required for CIE (Fig. 3D-E). This was unexpected, as *ROM1* appeared to  
262 improve Ste3-GFP internalization in *bik1Δ*, but not *bim1Δ* 4Δ+ENTH1 cells (Fig. 3A). Notably,  
263 the decrease in Ste3-pHluorin intensity for *bim1Δ* 4Δ+ENTH1 cells expressing high-copy *ROM1*  
264 versus empty vector (14.6% reduction) was much smaller than that of *bik1Δ* 4Δ+ENTH1 cells  
265 (47.4% reduction), suggesting a greater effect for *bim1Δ* than for *bik1Δ*. Combined with the PM  
266 retention of Ste3-GFP in *bim1Δ* 4Δ+ENTH1 cells, it is thus possible that Bik1 plays a weaker  
267 role in CIE, or that the two proteins share overlapping function through their function in distinct  
268 cMT capture pathways or interactions with Kar9. Unfortunately, *bim1Δ bik1Δ* cells are inviable,  
269 so we were unable to directly test this possibility (Schwartz et al., 1997). Nonetheless, these data  
270 suggest that Kar9 and microtubule plus end-binding proteins contribute to CIE.

271

### 272 *Stability of cytoplasmic microtubules contributes to CIE*

273 Given our observations that Myo2- and Kar9-dependent transport of microtubules is required  
274 for CIE in yeast, we decided to more directly test the involvement of microtubules in this  
275 process. We previously showed that actin is required for CIE in addition to its established role in  
276 CME by treating cells with the actin-depolymerizing drug Latrunculin A (LatA; (Prosser et al.,  
277 2011)). Using WT, 4Δ+Ent1 and 4Δ+ENTH1 cells transformed with empty vector, as well as

278 4 $\Delta$ +ENTH1 cells with high-copy *ROM1*, we examined Ste3-GFP localization in vehicle  
279 (DMSO), LatA, and nocodazole-treated cells to determine whether microtubule  
280 depolymerization would also affect Rom1-dependent internalization (Fig. 4). As seen previously,  
281 two-hour treatment with LatA potently inhibited endocytosis in all strains, where Ste3-GFP was  
282 almost completely retained at the PM (Prosser et al., 2011). In contrast, DMSO-treated controls  
283 showed the expected pattern of primarily vacuolar Ste3-GFP in WT and 4 $\Delta$ +Ent1 cells with  
284 empty vector, prominent PM retention in 4 $\Delta$ +ENTH1 cells with empty vector, and improved  
285 internalization in 4 $\Delta$ +ENTH1 with high-copy *ROM1*. Ste3-GFP showed similar localization in  
286 nocodazole- and DMSO-treatment conditions for WT, 4 $\Delta$ +Ent1 and 4 $\Delta$ +ENTH1 cells with  
287 empty vector. In contrast, 4 $\Delta$ +ENTH1 cells with high-copy *ROM1* appeared to show weaker  
288 Ste3-GFP internalization with nocodazole-treatment compared to DMSO. Thus, microtubules  
289 appear to participate in CIE.

290 Since force must be exerted at the PM for endocytosis to occur, we further reasoned that  
291 stability of cytoplasmic microtubules is required for CIE. The kinesin-related motors Kip2 and  
292 Kip3 play opposing roles in regulating cytoplasmic microtubule stabilization, where Kip2  
293 inhibits catastrophe and promotes microtubule polymerization, while Kip3 destabilizes  
294 microtubules (Miller et al., 1998). Thus, *kip2* $\Delta$  results in destabilization of cytoplasmic  
295 microtubules, while *kip3* $\Delta$  causes their hyper-stabilization. We generated *kip2* $\Delta$  and *kip3* $\Delta$  strains  
296 in WT, 4 $\Delta$ +Ent1 and 4 $\Delta$ +ENTH1 backgrounds, and used these to examine Ste3-GFP  
297 localization. Neither *kip2* $\Delta$  nor *kip3* $\Delta$  altered the predominantly vacuolar localization of Ste3-  
298 GFP in WT or 4 $\Delta$ +Ent1 backgrounds with empty vector, as expected for strains with functional  
299 CME (Fig. 5A). In *kip2* $\Delta$  4 $\Delta$ +ENTH1 cells with empty vector, Ste3-GFP largely accumulated at  
300 the PM, consistent with a block in CME. Transformation of *kip2* $\Delta$  4 $\Delta$ +ENTH1 cells with high-  
301 copy *ROM1* did not noticeably improve Ste3-GFP internalization. Interestingly, empty vector-  
302 transformed *kip3* $\Delta$  4 $\Delta$ +ENTH1 cells showed lower PM accumulation of Ste3-GFP with  
303 correspondingly higher vacuolar delivery, and high-copy *ROM1* gave similar distribution of the  
304 cargo. These findings correlate with microtubule stability: we were unable to observe  
305 cytoplasmic microtubules in *kip2* $\Delta$  cells expressing GFP-Tub1 compared to WT cells; in  
306 contrast, *kip3* $\Delta$  cells showed exaggerated cytoplasmic microtubules that appeared to wrap around  
307 the cell cortex (Fig. 5B).

308 Quantification of Ste3-pHluorin intensity in *kip2Δ* and *kip3Δ* strains supported our  
309 observations of Ste3-GFP localization. For *kip2Δ* or *kip2Δ* 4Δ+Ent1 cells with empty vector,  
310 whole-cell Ste3-pHluorin intensity was similarly low, while *kip2Δ* 4Δ+ENTH1 cells with empty  
311 vector were significantly brighter (Fig. 5C). Consistent with a requirement for Kip2 in CIE,  
312 transformation of *kip2Δ* 4Δ+ENTH1 cells with high-copy *ROM1* failed to improve  
313 internalization, as shown by similar brightness to *kip2Δ* 4Δ+ENTH1 cells with empty vector.  
314 Deletion of *KIP3* in 4Δ+ENTH1 cells with empty vector also resulted in a small, but significant  
315 increase in Ste3-pHluorin intensity compared to *kip3Δ* or *kip3Δ* 4Δ+Ent1 cells (Fig. 5D);  
316 however, this increase (33.7% for *kip3Δ* 4Δ+ENTH1 compared to *kip3Δ* with empty vector) was  
317 much smaller than seen when comparing *kip2Δ* to *kip2Δ* 4Δ+ENTH1 with empty vector (99.2%  
318 increase). Transformation of *kip3Δ* 4Δ+ENTH1 cells with high-copy *ROM1* resulted in Ste3-  
319 pHluorin intensity levels that were indistinguishable from *kip3Δ*, *kip3Δ* 4Δ+Ent1, or *kip3Δ*  
320 4Δ+ENTH1 cells with empty vector. Taken together, these experiments demonstrate that  
321 stability of cytoplasmic microtubules is required for CIE, and that their stabilization may  
322 increase clathrin-independent endocytosis in yeast.

323

### 324 *Dynein and dynactin are required for CIE in yeast*

325 Our findings that cytoplasmic microtubules, and Myo2-dependent transport of microtubule  
326 plus ends, contribute to CIE prompted us next to examine whether the minus end-directed  
327 microtubule motor dynein and its cofactor dynactin are also needed. As microtubule plus ends  
328 are transported along actin cables, dynein and dynactin are targeted to the plus end through an  
329 interaction between the dynein heavy chain (Dyn1) and Pac1 (homolog of the mammalian  
330 lissencephaly protein, LIS1), which in turn binds to Bik1 (Sheeman et al., 2003). To explore the  
331 role of this protein module in CIE, we focused on four deletions: *dyn1Δ* (dynein heavy chain)  
332 and *pac11Δ* (dynein intermediate chain) which cause a loss of dynein function, *nip100Δ*  
333 (dynactin p150<sup>Glued</sup> subunit) which causes a loss of dynactin function, and *pac1Δ* which disrupts  
334 plus end-tracking of dynein/dynactin (Geiser et al., 1997; Sheeman et al., 2003). We generated  
335 each of these deletions in WT, 4Δ+Ent1, and 4Δ+ENTH1 backgrounds, and subsequently  
336 examined Ste3-GFP localization and the effect of high-copy *ROM1* on Ste3 internalization in the  
337 CME-defective 4Δ+ENTH1 strain. As expected for each WT and 4Δ+Ent1 background  
338 transformed with empty vector, Ste3-GFP was efficiently delivered to the vacuole, indicating

339 that loss of dynein/dynactin function or plus end-tracking are not required for cargo  
340 internalization when CME is functional (Fig. 6A). In *dyn1Δ*, *pac11Δ*, *nip100Δ*, and *pac1Δ*  
341 4Δ+ENTH1 cells transformed with empty vector, Ste3-GFP localized prominently at the PM,  
342 indicating a reduction in internalization. When each of the corresponding 4Δ+ENTH1  
343 backgrounds were instead transformed with high-copy *ROM1*, Ste3-GFP retention at the PM was  
344 similar to cells with empty vector. Quantification of Ste3-pHluorin intensity confirmed the  
345 endocytic effects observed with Ste3-GFP: *dyn1Δ*, *pac11Δ*, *nip100Δ*, and *pac1Δ* in WT and  
346 4Δ+Ent1 backgrounds with empty vector had similarly low fluorescence intensity, which was  
347 significantly higher in the 4Δ+ENTH1 background (Fig. 6B-E). Transformation of *dyn1Δ*,  
348 *pac11Δ*, *nip100Δ*, and *pac1Δ* 4Δ+ENTH1 cells with high-copy *ROM1* failed to reduce the  
349 elevated Ste3-pHluorin intensity, indicating that Rom1 was no longer able to improve cargo  
350 internalization in the absence of dynein/dynactin or Pac1 function.

351

#### 352 *Cortical microtubule capture is required for CIE in yeast*

353 Once Myo2 delivers microtubule plus end to the cell cortex, an offloading event occurs in  
354 which the dynein intermediate chain Pac11 (in complex with microtubules) associates with  
355 Num1, a protein that forms stable patches at the cell cortex (Lee et al., 2003; Lee et al., 2005).  
356 These patches are sites of cMT anchoring, where Num1 binding to Pac11 leads to dynein  
357 activation by relieving the inhibitory activity of Pac1. Activated dynein is a minus end-directed  
358 motor, which pulls on the cytoplasmic microtubule to position the nucleus at the neck of large-  
359 budded cells in preparation for mitosis (Kahana et al., 1998). Since our data indicate that  
360 cytoplasmic microtubules and dynein/dynactin are involved in CIE, we generated *num1Δ* strains  
361 to test whether cMT anchoring is also required. As shown in in Fig. 7A, *num1Δ* did not affect  
362 vacuolar Ste3-GFP delivery in WT and 4Δ+Ent1 backgrounds transformed with empty vector,  
363 indicating that Num1 is not required for cargo internalization when CME is functional. In  
364 contrast, Ste3-GFP was prominently retained at the plasma membrane in *num1Δ* 4Δ+ENTH1  
365 cells with empty vector, and this defective localization was not corrected by transformation with  
366 high-copy *ROM1*. Similarly, quantification of Ste3-pHluorin intensity in *num1Δ* cells showed  
367 low fluorescence in WT and 4Δ+Ent1 backgrounds with empty vector, in agreement with  
368 vacuolar localization seen for Ste3-GFP (Fig. 7B). As expected, Ste3-pHluorin intensity was  
369 significantly higher in *num1Δ* 4Δ+ENTH1 cells with empty vector. Transformation of *num1Δ*

370 4Δ+ENTH1 cells with high-copy *ROM1* failed to improve the elevated fluorescence intensity of  
371 Ste3-pHluorin compared to empty vector; in fact, *ROM1*-transformed cells were significantly  
372 brighter than the vector control in *num1Δ* 4Δ+ENTH1 cells, similar to *myo2<sup>K1408A</sup>* 4Δ+ENTH1  
373 cells defective in Myo2-dependent microtubule transport (Fig. 2E). Thus, cMT capture and  
374 anchoring, in addition to transport of cytoplasmic microtubules, appears to be required for CIE.

375 In our examination of the role of microtubules and cMT capture machinery in CIE, we  
376 considered the possibility that mitotic spindle positioning may be altered in cells with defective  
377 CME or that strains with defective CIE may share a spindle orientation defect. Thus, we  
378 generated strains with a chromosomal integration of *GFP-TUB1*, expressed from the *TUB1*  
379 promoter, at the *LYS2* gene locus. WT, 4Δ+Ent1 and 4Δ+ENTH1 cells with empty vector or  
380 high-copy *ROM1* all had similar microtubule morphologies in unbudded and budded cells, with  
381 no obvious spindle misorientation, suggesting that inhibition of CME or overexpression of  
382 *ROM1* did not alter the microtubule cytoskeleton (Supplementary Fig. S2A). Additionally, we  
383 examined GFP-Tub1 in a variety of other strains harboring deletions in cMT transport and  
384 capture. With these strains, we observed spindle orientation similar to WT cells in some cases  
385 (*kar9Δ*, *bim1Δ*, *bik1Δ* and *pac1Δ*), but a severe spindle misalignment in cells with defective  
386 dynein, dynactin or cMT anchoring (*dyn1Δ*, *pac11Δ*, *nip100Δ* and *num1Δ*; Supplementary Fig.  
387 S2B). All spindle orientation phenotypes were similar when these mutations were generated in  
388 the 4Δ+Ent1 and 4Δ+ENTH1 backgrounds (data not shown). Our observations agree with  
389 numerous prior studies showing spindle misalignment in many mutants with defective cMT  
390 capture and nuclear positioning (Eshel et al., 1993; Farkasovsky and Küntzel, 1995; Kahana et  
391 al., 1998; Miller and Rose, 1998; Stuchell-Brereton et al., 2011). Notably, spindle misalignment  
392 is not necessarily required for a role of these proteins in CIE, since *kar9Δ* and *pac1Δ*, which had  
393 normal spindle orientation, both prevented Rom1-dependent activation of CIE in 4Δ+ENTH1  
394 cells (Anderson et al., 2022; Lee et al., 2003). Moreover, we previously showed that Bni1 is  
395 required downstream of Rho1 for CIE, and we did not observe spindle orientation defects in  
396 *bni1Δ* 4Δ+ENTH1 cells (data not shown).

## 397 **Discussion**

398 Although a variety of clathrin-independent endocytic pathways have now been observed in  
399 most eukaryotes, the molecular mechanisms governing CIE have remained elusive compared to  
400 our understanding of CME. Many aspects of CIE have not yet been addressed in detail, due in  
401 part to the relatively small number of proteins implicated in CIE and a lack of tools to study  
402 these pathways. In turn, this leaves open questions about (1) the degree of overlap in protein  
403 machinery between different CIE pathways or between CME and CIE, (2) the relative level of  
404 complexity required to generate clathrin-coated and clathrin-independent vesicles, (3)  
405 mechanisms for generating the force required for membrane deformation, curvature stabilization  
406 and vesicle scission in the absence of a clathrin coat, (4) how cells select and sort cargo into  
407 different endocytic pathways, and (5) the relative contribution of CME and CIE to cargo and  
408 membrane internalization.

409 Our previous discovery of the first CIE pathway observed in budding yeast has provided us  
410 with a genetically tractable system to begin answering these questions (Prosser et al., 2011).  
411 Earlier studies identified a signaling cascade involving the cell wall stress sensor Mid2, the Rho1  
412 GEFs Rom1 and Rom2, the Rho1 GTPase and its effector Bni1 (along with Bni1-recruiting and -  
413 activating proteins in the polarisome) as central components of CIE in yeast. Moreover, the  
414 early-acting CME machinery protein Syp1 contributes to both clathrin-dependent and clathrin-  
415 independent internalization of cargos such as the di- and tri-peptide transporter Ptr2 (Apel et al.,  
416 2017). Syp1 contains an N-terminal Fes/CIP4 homology-Bin/Amphiphysin/Rvs (F-BAR)  
417 domain involved in sensing and inducing membrane curvature and a cargo-binding  $\mu$ -homology  
418 domain ( $\mu$ HD) at its C-terminus, both of which are required for localization to and function at  
419 CME sites (Reider et al., 2009). Syp1 directly binds to and promotes internalization of Mid2,  
420 likely through CME since we have not observed Mid2 internalization under conditions where  
421 CIE promotes uptake of Ste3 or other cargos (D. Prosser, unpublished results); thus, it is unclear  
422 whether Syp1 plays mechanistically similar roles in CME and CIE. Finally,  $\alpha$ -arrestins, which  
423 act as cargo-selective adaptors for the ubiquitin ligase Rsp5 during CME, also participate in CIE  
424 through interactions with proteins such as Rom2 and Rho1 (Prosser et al., 2015). Rsp5 and its  
425 interaction with  $\alpha$ -arrestins is not required for CIE, even though the  $\alpha$ -arrestins retain their  
426 cargo-selective roles in directing proteins to CIE. While the majority of yeast CME proteins



427 tested to date are not required for CIE, these prior findings demonstrate that limited sets of  
428 proteins participate in both pathways.

429 The current study expands our understanding of CIE in yeast by identifying additional  
430 components of the pathway: the type V myosin Myo2, microtubules and plus end-binding  
431 proteins (Kar9, and possibly Bim1 and Bik1), regulators of cytoplasmic microtubule stability  
432 (Kip2 and Kip3), cMT capture (Num1), and dynein/dynactin (Dyn1, Pac11 and Nip100; Fig. 8).  
433 None of these proteins have been previously implicated in CME to our knowledge, and  
434 membrane trafficking roles for microtubules or microtubule-based motors remain largely  
435 undefined in yeast. Notably, tubulin and the plus end-tracking protein Bik1 were reported to play  
436 roles in trafficking of the v-SNARE Snc1, where mutations in Tub1 or Bik1 caused PM  
437 accumulation of Snc1 reminiscent of the endocytosis-defective Snc1<sup>end-</sup> mutant (Boscheron et al.,  
438 2016; Lewis et al., 2000). Importantly, Snc1 mislocalization in *tub1-Glu* and *bik1Δ* mutants was  
439 corrected by expression of constitutively active Rho1<sup>G19V</sup>. This suggests a possible role for CIE  
440 in the observed effects, although contributions of CME cannot be ruled out. In our study, Bik1  
441 was not required for CIE of Ste3-GFP (Fig. 3), which might be explained by overlapping  
442 functions with Bim1 or other components of microtubule plus end-binding or tracking.  
443 Alternatively, specific endocytic cargos may physically associate with different proteins  
444 involved in CIE and/or microtubule regulation to allow recruitment into an endocytic carrier,  
445 either directly or indirectly through proteins such as  $\alpha$ -arrestins. For example, the  $\alpha$ -arrestin  
446 Bul2 associates with the dynactin subunit Nip100, which may allow direct links between cargos  
447 and microtubule-based transport machinery (Wang et al., 2012). As we do not yet understand  
448 how cargo is selected into CIE pathways, identifying proteins that serve as CIE cargo-selective  
449 adaptors will be an interesting future direction.

450 Separate from the role of Bik1 and tubulin in Snc1 trafficking, another study identified a role  
451 for the dynein light chain-family protein Tda2 in CME (Farrell et al., 2017). Rather than acting  
452 with microtubules and dynein, this novel role for Tda2 appears to rely on formation of a complex  
453 with Aim21 and the actin-capping proteins Cap1 and Cap2, leading to association with the CME  
454 protein Bbc1 and subsequent regulation of Arp2/3-dependent actin polymerization at cortical  
455 actin patches. Although these findings do not rule out a relationship between Tda2 and  
456 microtubules distinct from its contribution to CME, it is unlikely that Tda2 participates in CIE,

457 since high-copy *ROM1* promotes Ste3-GFP internalization in *aim21Δ* 4Δ+ENTH1 cells (D.  
458 Prosser, unpublished results).

459 The degree of similarity between yeast and mammalian CIE remains a major unresolved  
460 question, in large part because of the limited set of proteins linked to any CIE pathway. As we  
461 add to the number of proteins involved in yeast CIE, it is tempting to speculate on how these  
462 relate to pathways in higher eukaryotes. Studies of several different pathways have identified  
463 roles for homologs of proteins involved in yeast CIE. For example, clathrin-independent ultrafast  
464 endocytosis occurs at synapses in mammals and *C. elegans*, and requires actin polymerization  
465 and formins (Bni1 in yeast; (Soykan et al., 2017; Watanabe et al., 2013a; Watanabe et al.,  
466 2013b)). Additionally, fast endophilin-mediated endocytosis (FEME) utilizes microtubules and  
467 dynein for inward transport of tubular endocytic carriers, as does clathrin-independent  
468 internalization of cholera toxin (Boucrot et al., 2015; Casamento and Boucrot, 2020; Day et al.,  
469 2015; Ferreira et al., 2021; Watanabe and Boucrot, 2017). Microtubules and the plus end-binding  
470 protein EB1 (Bim1 in yeast) contribute to endocytosis in *Drosophila* oocytes, although roles for  
471 clathrin in this process have not been addressed (Sanghavi et al., 2012). Lastly, RhoA and  
472 integrins (similar to yeast Rho1 and Mid2, respectively) are required for clathrin-independent  
473 compensatory endocytosis in bladder umbrella cells and for internalization of the IL-2 receptor  
474 (Khandelwal et al., 2010; Lamaze et al., 2001). While additional parallels likely exist, these  
475 suggest that the protein machinery involved in a variety of CIE pathways may at least partially  
476 overlap. Alternatively, yeast CIE may represent an ancestral form of clathrin-independent  
477 endocytosis that has branched or diverged during evolution. It will be interesting to test whether  
478 additional components of the yeast pathway contribute to CIE mechanisms in other eukaryotes,  
479 and our ability to identify additional CIE components using yeast genetics has the potential to  
480 rapidly expand our understanding of these pathways.

481 With an increase in our understanding of CIE pathways and the protein machinery that  
482 enables clathrin-independent internalization, insights into relationships between CIE and human  
483 diseases may also emerge. To date, homologs of several yeast CIE proteins have been linked to  
484 disease. For example, mutations in diaphanous-related formins, which are homologous to yeast  
485 Bni1, are associated with microcephaly and related developmental disorders (Labat-de-Hoz and  
486 Alonso, 2021). From our current study, Pac1 is related to the lissencephaly-related protein LIS1,  
487 while Kar9 is related to the APC protein involved in colorectal cancer (Geiser et al., 1997;

488 Korinek et al., 2000). Moreover, the dynactin p150<sup>Glued</sup> subunit associates with the huntingtin-  
489 associated protein HAP1 (Li et al., 1998); these may act in a complex involved in vesicular  
490 transport, particularly in axons. While direct roles for these proteins in mammalian CIE remain  
491 unclear, both in health and disease, it will be interesting to assess whether disease-linked  
492 mutations or losses of function alter cargo internalization, and whether such an effect might  
493 contribute to cellular dysfunction in disease.

494 Overall, our findings lead us to propose a model in which the interplay between myosin- and  
495 actin-dependent transport of microtubules, their cortical capture, and activation of  
496 dynein/dynactin promote CIE in yeast (Fig. 8). Myo2-dependent delivery of microtubule plus  
497 ends to the cell cortex requires on Kar9 and Bim1. As the plus end is transported through the  
498 cytoplasm, tracking proteins such as Bik1 and Pac1 promote loading and retention of  
499 dynein/dynactin, albeit in an inhibited state, and redundant pathways involving these proteins  
500 help to ensure the fidelity of microtubule delivery to the cell cortex (Adames and Cooper, 2000;  
501 Farkasovsky and Kuntzel, 2001; Lee et al., 2000; Miller and Rose, 1998; Miller et al., 2000; Yin  
502 et al., 2000). Once delivered to the cell periphery, a hand-off event occurs wherein dynein  
503 associates with the cMT-capturing protein Num1, leading to cMT offloading from Myo2, dynein  
504 activation and minus end-directed motility (Lee et al., 2003; Lee et al., 2005). These events are  
505 thought to be necessary for the force generation required to position the nucleus at the bud neck  
506 during mitosis, thereby ensuring chromosome segregation and nuclear partitioning between  
507 mother and daughter cells. However, since dynein is tethered to Num1 at the cell cortex during  
508 this process, it seems plausible that minus end-directed motor activity could also exert inward  
509 force at the plasma membrane. Combined with Bni1-generated actin filaments and Myo2 motor  
510 activity, this could facilitate membrane bending in the absence of clathrin, which is needed to  
511 overcome the high turgor pressure in yeast cells (Aghamohammadzadeh and Ayscough, 2009).  
512 Our observation that cytoplasmic microtubules contribute to the Rho1 pathway supports a role in  
513 CIE, even though cytoplasmic microtubules appear to be sparse under most conditions in yeast.  
514 It is thus plausible that microtubule cytoskeleton-stabilizing environmental conditions could  
515 provide clues about how yeast CIE is regulated. Our future studies will examine this possibility,  
516 and will further test roles for the interaction network between actin, microtubules, and their  
517 respective motor proteins in membrane and protein internalization.

## 518 **Materials and Methods**

### 519 *Yeast strains, plasmids, and growth conditions*

520 Strains and plasmids used in this study are described in supplementary tables S1 and S2,  
521 respectively. Yeast were grown in liquid or plate-based YPD medium or on YNB (SD) medium  
522 lacking uracil, tryptophan, histidine and/or lysine for maintenance of non-essential plasmids. All  
523 cells were grown at 30°C and imaged at room temperature. PCR-based tagging of genomic loci  
524 and gene knockouts were performed as described previously (Goldstein and McCusker, 1999;  
525 Longtine et al., 1998). Transformations for plasmid uptake or for genomic integrations were  
526 performed using the LiAc method (Schiestl and Gietz, 1989). Unless otherwise specified,  
527 chemicals and reagents were purchased from Sigma-Aldrich or from Fisher Scientific.

528

### 529 *Construction and confirmation of MYO2 IQ repeat truncations*

530 Plasmids for truncating Myo2 IQ repeats at the genomic *MYO2* locus with *HIS3* selection  
531 were generously provided by Dr. Anthony Bretscher (Cornell; (Schott et al., 1999; Schott et al.,  
532 2002)). The full-length control *MYO2*<sup>61Q</sup> plasmid was linearized with SpeI, while the truncated  
533 *myo2*<sup>41Q</sup> and *myo2*<sup>21Q</sup> plasmids were linearized with BamHI, transformed into SEY6210 *MATα*  
534 wild-type or *ent1::LEU2 yap1802::LEU2* cells, and selected on YNB medium lacking histidine.  
535 *ent1::LEU2 yap1802::LEU2* cells with Myo2 modifications were then mated with *MATα*  
536 *ent2::HIS3 yap1801::HIS3* cells. Resulting diploids were transformed with pENT2.416 [*CEN*  
537 *URA3*], sporulated and tetrad dissected, and resulting *ent1::LEU2 ent2::HIS3 yap1801::HIS3*  
538 *yap1802::LEU2*+pENT2.416 (4Δ+Ent2) cells were confirmed by PCR. Cells were then  
539 transformed with pENT1.414 or pENTH1.414 and grown on 5-FOA plates to select for loss of  
540 the pENT2.416 plasmid, yielding 4Δ+Ent1 and 4Δ+ENTH1 cells with wild-type or truncated  
541 Myo2. All Myo2 truncations were confirmed by PCR using the following primers: 5'-  
542 TTGATGGTGTGTCTCAACTCAGAG-3' and 5'-CATTGATTTGTGTAGCATTGACACC-  
543 3', which amplify nucleotides 2047-3472 of the wild-type *MYO2* coding sequence containing the  
544 IQ repeat region. PCR products were then resolved by gel electrophoresis, and truncations were  
545 confirmed by differences in size compared to full-length *MYO2*.

546

547

548

549 *Construction and confirmation of myo2 cargo-binding domain mutant strains*

550 Plasmids for low-copy expression of *MYO2* or *myo2*<sup>CBD</sup> mutants with *HIS3* selection were  
551 generous gifts from Dr. Lois Weisman (Univ. Michigan; (Catlett and Weisman, 1998; Eves et  
552 al., 2012; Ishikawa et al., 2003; Pashkova et al., 2006)). We used these as a starting point for  
553 generating chromosomally-integrated CBD mutants at the endogenous *MYO2* locus and  
554 expressed as the sole source of Myo2. To accomplish this, we isolated the 1.5 kb EcoRI fragment  
555 from wild-type and CBD mutant Myo2.413 plasmids containing the C-terminal CBD and 3'  
556 untranslated region of *MYO2* for subcloning into the EcoRI site of pRS404. Resulting plasmids  
557 were confirmed by sequencing, and the orientation of all inserts placed the 5' end of the Myo2  
558 CBD proximal to the KpnI end of the polylinker. The plasmids were then linearized with NruI,  
559 transformed into SEY6210 *MAT $\alpha$*  wild-type or 4 $\Delta$ +pENT2.416 cells, and selected on YNB  
560 medium lacking tryptophan. 4 $\Delta$ +Ent2 cells were then transformed with pENT1.317 or  
561 pENTH1.317 and selected on YNB medium lacking lysine. Cells were subsequently grown on 5-  
562 FOA plates to select for loss of the pENT2.416 plasmid, yielding Myo2 WT or CBD mutant-  
563 expressing 4 $\Delta$ +Ent1 and 4 $\Delta$ +ENTH1 strains. All WT and 4 $\Delta$  strains with Myo2 CBD  
564 modifications were confirmed by isolation of genomic DNA and PCR amplification of the  
565 *MYO2* CBD using forward primer 5'-CTACCTCAAACACCATTAAAGGATG-3' and T3 as the  
566 reverse primer. The resulting 1683 bp product spanning the 3' end of *MYO2* upstream of the  
567 integration site through the 3' untranslated region was then isolated using a PCR purification kit  
568 (Qiagen), and mutations were confirmed by sequencing using primer 5'-  
569 CTCATTTGTGGTGTGGCTC-3', which anneals to the *MYO2* CDS beginning at nucleotide  
570 3777 downstream of the +1 site.

571

572 *Latrunculin A and Nocodazole treatment*

573 Liquid cultures of WT, 4 $\Delta$ +Ent1 and 4 $\Delta$ +ENTH1 cells expressing Ste3-GFP and transformed  
574 with empty vector (pRS426) or high-copy *ROM1* were grown to mid-logarithmic phase at 30°C  
575 in YNB medium lacking uracil (Christianson et al., 1992; Ozaki et al., 1996). 0.7 OD<sub>600</sub> of each  
576 strain was then pelleted by centrifugation at 3500 x g for 5 min, and cells were resuspended in 25  
577  $\mu$ l of YNB -ura medium supplemented with 200  $\mu$ M Latrunculin A (Enzo Life Sciences), 15  
578  $\mu$ g/ml Nocodazole, or an equivalent volume of DMSO as a vehicle control. Cells were then  
579 incubated at 30°C for 2 h prior to imaging by fluorescence microscopy.

580

581 *Visualization of actin morphology*

582 To visualize actin patches and cables, yeast cells were stained using a protocol modified from  
583 (Amberg, 1998). Briefly, *myo3Δ myo5Δ* cells were grown to mid-logarithmic phase in YNB  
584 medium lacking uracil for plasmid selection. Cells were fixed at room temperature for 30 min by  
585 addition of formaldehyde to a final concentration of 4% (v/v), then pelleted by centrifugation at  
586 3000 x g for 5 min. Pellets were washed twice with phosphate-buffered saline (PBS) and stained  
587 for 1 h with Alexa 568 phalloidin (Thermo Fisher) dissolved in methanol, and diluted to a final  
588 concentration of 1.65  $\mu\text{M}$  in PBS. Cells were then washed three times with PBS prior to imaging  
589 by fluorescence microscopy.

590

591 *Fluorescence microscopy and image analysis*

592 Images were collected using either an Axiovert 200 inverted fluorescence microscope (Zeiss)  
593 equipped with a 100X, 1.4 NA Plan-Apochromat oil immersion objective, Sensicam (Cooke), X-  
594 Cite 120 PC light source, and SlideBook 4.2 software (3i) or using a DMI8 inverted fluorescence  
595 microscope (Leica) equipped with a 100X, 1.47 NA Plan-Apochromat oil immersion objective,  
596 LED3 fluorescence illumination system, Flash 4.0 v3 sCMOS camera (Hamamatsu) and LAS X  
597 v3.7.6.25997 (Leica). Within each experiment, all strains were imaged with the same acquisition  
598 parameters and on the same day. All imaging was performed using cells grown to mid-  
599 logarithmic phase.

600 Following acquisition, images were processed using Fiji/ImageJ2 v2.9.0/1.53t. Within each  
601 experiment, identical post-imaging processing was performed on all images to set identical  
602 minimum and maximum intensity levels, allowing direct comparison of protein localization and  
603 fluorescence intensity.

604 For visualization of phalloidin-labeled cells, z-stacks were collected at 0.25  $\mu\text{m}$  step intervals  
605 spanning the entire depth of cells. Stacks were then collapsed into a maximum intensity z-  
606 projection image using Fiji/ImageJ2.

607

608 *Quantification of Ste3-pHluorin intensity*

609 Quantification of Ste3-pHluorin intensity was performed as described previously (Prosser et  
610 al., 2010; Prosser et al., 2016). Briefly, random fields of cells for each condition analyzed were

611 visualized by DIC prior to imaging by fluorescence microscopy. All conditions within an  
612 experiment were imaged on the same day, using identical acquisition parameters. Background  
613 subtraction was then performed on 16-bit images, individual cells were selected for measurement  
614 of whole-cell fluorescence intensity, and values were corrected for cell size. Pre-determined  
615 criteria for exclusion of cells from analysis are described in (Prosser et al., 2016).

616

### 617 *Statistical analysis*

618 Power analysis was performed to determine population sizes using G\*Power v3.1.9.6, with  
619 type I error  $\alpha=0.05$ , type II error  $\beta=0.2$  (power,  $1-\beta=0.8$ ), and a moderate effect size  $f=0.3$ . For  
620 experiments with four groups (WT, 4 $\Delta$ +Ent1 and 4 $\Delta$ +ENTH1 backgrounds with empty vector;  
621 4 $\Delta$ +ENTH1 with high-copy *ROM1*) using one-way ANOVA, the analysis recommended a  
622 minimum of 32 cells measured per condition.

623 Statistical significance for all quantitative experiments was assessed using one-way ANOVA  
624 followed by Tukey's Multiple Comparison test in Prism 7 (GraphPad).

625

### 626 **Acknowledgements**

627 We would like to gratefully acknowledge gifts of *MYO2* plasmids from Drs. Lois Weisman  
628 (University of Michigan) and Anthony Bretscher (Cornell). We also thank Drs. M. Andrew Hoyt  
629 (Johns Hopkins), Trina Schroer (Johns Hopkins) and Lois Weisman, as well as members of the  
630 Wendland and Prosser labs for helpful discussions, Joanna Poprawski and Lydia Nyasae for  
631 excellent technical assistance, and J. Michael McCaffery and Erin Pryce (Johns Hopkins  
632 Integrated Imaging Center) for advice on imaging. This work was initiated in the laboratory of  
633 Dr. Beverly Wendland (Johns Hopkins), and her advice, support, and mentorship have been  
634 immeasurably valuable; we acknowledge her contributions with the strongest possible gratitude.

635

### 636 **Competing Interests**

637 The authors declare no financial or competing interests.

638

### 639 **Funding**

640 This work was supported by a National Science Foundation CAREER award [MCB 1942395 to  
641 D.C.P.], and startup funds from Virginia Commonwealth University [to D.C.P.].

642 **References**

- 643
- 644 Adames, N. R. and Cooper, J. A. (2000). Microtubule interactions with the cell cortex causing  
645 nuclear movements in *Saccharomyces cerevisiae*. *J. Cell Biol.* 149, 863–874.
- 646 Aghamohammadzadeh, S. and Ayscough, K. R. (2009). Differential requirements for actin  
647 during yeast and mammalian endocytosis. *Nat. Cell Biol.* 11, 1039–1042.
- 648 Aguilar, R. C., Longhi, S. A., Shaw, J. D., Yeh, L.-Y., Kim, S., Schön, A., Freire, E., Hsu, A.,  
649 McCormick, W. K., Watson, H. A., et al. (2006). Epsin N-terminal homology domains  
650 perform an essential function regulating Cdc42 through binding Cdc42 GTPase-activating  
651 proteins. *Proc. Natl. Acad. Sci. U.S.A.* 103, 4116–4121.
- 652 Amberg, D. C. (1998). Three-dimensional imaging of the yeast actin cytoskeleton through the  
653 budding cell cycle. *Mol. Biol. Cell* 9, 3259–3262.
- 654 Anderson, E. and Batten, B. E. (1983). Surface binding, uptake and fate of cationic ferritin in a  
655 steroid producing ovarian cell. *Tissue Cell* 15, 853–71.
- 656 Anderson, B. L., Boldogh, I., Evangelista, M., Boone, C., Greene, L. A. and Pon, L. A. (1998).  
657 The Src homology domain 3 (SH3) of a yeast type I myosin, Myo5p, binds to verprolin and is  
658 required for targeting to sites of actin polarization. *J. Cell Biol.* 141, 1357–1370.
- 659 Anderson, H. L., Casler, J. C. and Lackner, L. L. (2022). Hierarchical integration of  
660 mitochondrial and nuclear positioning pathways by the Num1 EF hand. *Mol. Biol. Cell* 33,  
661 ar20.
- 662 Apel, A. R., Hoban, K., Chuartzman, S., Tonikian, R., Sidhu, S., Schuldiner, M., Wendland, B.  
663 and Prosser, D. (2017). Syp1 regulates the clathrin-mediated and clathrin-independent  
664 endocytosis of multiple cargo proteins through a novel sorting motif. *Mol. Biol Cell* 28, 2434–  
665 2448.
- 666 Beach, D. L., Thibodeaux, J., Maddox, P., Yeh, E. and Bloom, K. (2000). The role of the  
667 proteins Kar9 and Myo2 in orienting the mitotic spindle of budding yeast. *Curr. Biol.* 10,  
668 1497–1506.
- 669 Blik, A. van der, Redelmeier, T., Damke, H., Tisdale, E., Meyerowitz, E. and Schmid, S.  
670 (1993). Mutations in human dynamin block an intermediate stage in coated vesicle formation.  
671 *J. Cell Biol.* 122, 553–563.
- 672 Bobola, N., Jansen, R.-P., Shin, T. H. and Nasmyth, K. (1996). Asymmetric Accumulation of  
673 Ash1p in Postanaphase Nuclei Depends on a Myosin and Restricts Yeast Mating-Type  
674 Switching to Mother Cells. *Cell* 84, 699–709.



- 675 Boldogh, I. R., Ramcharan, S. L., Yang, H.-C. and Pon, L. A. (2004). A Type V Myosin  
676 (Myo2p) and a Rab-like G-Protein (Ypt11p) Are Required for Retention of Newly Inherited  
677 Mitochondria in Yeast Cells during Cell Division. *Mol. Biol. Cell* 15, 3994–4002.
- 678 Boscheron, C., Caudron, F., Loeillet, S., Peloso, C., Mugnier, M., Kurzawa, L., Nicolas, A.,  
679 Denarier, E., Aubry, L. and Andrieux, A. (2016). A role for the yeast CLIP170 ortholog, the  
680 plus-end-tracking protein Bik1, and the Rho1 GTPase in Snc1 trafficking. *J. Cell Sci.* 129,  
681 3332–3341.
- 682 Boucrot, E., Ferreira, A. P. A., Almeida-Souza, L., Debard, S., Vallis, Y., Howard, G., Bertot, L.,  
683 Sauvonnnet, N. and McMahon, H. T. (2015). Endophilin marks and controls a clathrin-  
684 independent endocytic pathway. *Nature* 517, 460–465.
- 685 Casamento, A. and Boucrot, E. (2020). Molecular mechanism of Fast Endophilin-Mediated  
686 Endocytosis. *Biochem. J.* 477, 2327–2345.
- 687 Catlett, N. L. and Weisman, L. S. (1998). The terminal tail region of a yeast myosin-V mediates  
688 its attachment to vacuole membranes and sites of polarized growth. *Proc. Natl. Acad. Sci.*  
689 *U.S.A.* 95, 14799–14804.
- 690 Christianson, T. W., Sikorski, R. S., Dante, M., Shero, J. H. and Hieter, P. (1992).  
691 Multifunctional yeast high-copy-number shuttle vectors. *Gene* 110, 119–22.
- 692 Damke, H., Baba, T., Warnock, D. E. and Schmid, S. L. (1994). Induction of mutant dynamin  
693 specifically blocks endocytic coated vesicle formation. *J. Cell Biol.* 127, 915–934.
- 694 Davis, N., Horecka, J. and Sprague, G. (1993). Cis- and trans-acting functions required for  
695 endocytosis of the yeast pheromone receptors. *J. Cell Biol.* 122, 53–65.
- 696 Day, C. A., Baetz, N. W., Copeland, C. A., Kraft, L. J., Han, B., Tiwari, A., Drake, K. R., Luca,  
697 H. D., Chinnapen, D. J.-F., Davidson, M. W., et al. (2015). Microtubule motors power plasma  
698 membrane tubulation in clathrin-independent endocytosis. *Traffic* 16, 572–590.
- 699 Epp, E., Walther, A., Lépine, G., Leon, Z., Mullick, A., Raymond, M., Wendland, J. and  
700 Whiteway, M. (2010). Forward genetics in *Candida albicans* that reveals the Arp2/3 complex  
701 is required for hyphal formation, but not endocytosis. *Mol. Microbiol.* 75, 1182–1198.
- 702 Epp, E., Nazarova, E., Regan, H., Douglas, L. M., Konopka, J. B., Vogel, J. and Whiteway, M.  
703 (2013). Clathrin- and Arp2/3-independent endocytosis in the fungal pathogen *Candida*  
704 *albicans*. *MBio* 4, e00476-13.
- 705 Eshel, D., Urrestarazu, L. A., Vissers, S., Jauniaux, J. C., Vliet-Reedijk, J. C. van, Planta, R. J.  
706 and Gibbons, I. R. (1993). Cytoplasmic dynein is required for normal nuclear segregation in  
707 yeast. *Proc. Natl. Acad. Sci. U.S.A.* 90, 11172–11176.

- 708 Evangelista, M., Pruyne, D., Amberg, D. C., Boone, C. and Bretscher, A. (2001). Formins direct  
709 Arp2/3-independent actin filament assembly to polarize cell growth in yeast. *Nat. Cell Biol.* 4,  
710 32–41.
- 711 Eves, P. T., Jin, Y., Brunner, M. and Weisman, L. S. (2012). Overlap of cargo binding sites on  
712 myosin V coordinates the inheritance of diverse cargoes. *J. Cell Biol.* 198, 69–85.
- 713 Fagarasanu, M., Fagarasanu, A., Tam, Y. Y. C., Aitchison, J. D. and Rachubinski, R. A. (2005).  
714 Inp1p is a peroxisomal membrane protein required for peroxisome inheritance in  
715 *Saccharomyces cerevisiae*. *J. Cell Biol.* 169, 765–775.
- 716 Fagarasanu, A., Mast, F. D., Knoblauch, B., Jin, Y., Brunner, M. J., Logan, M. R., Glover, J. N.  
717 M., Eitzen, G. A., Aitchison, J. D., Weisman, L. S., et al. (2009). Myosin-driven peroxisome  
718 partitioning in *S. cerevisiae*. *J. Cell Biol.* 186, 541–554.
- 719 Farkasovsky, M. and Küntzel, H. (1995). Yeast Num1p associates with the mother cell cortex  
720 during S/G2 phase and affects microtubular functions. *J. Cell Biol.* 131, 1003–1014.
- 721 Farkasovsky, M. and Küntzel, H. (2001). Cortical Num1p interacts with the dynein intermediate  
722 chain Pac11p and cytoplasmic microtubules in budding yeast. *J. Cell Biol.* 152, 251–262.
- 723 Farrell, K. B., McDonald, S., Lamb, A. K., Worcester, C., Peersen, O. B. and Pietro, S. M. D.  
724 (2017). Novel function of a dynein light chain in actin assembly during clathrin-mediated  
725 endocytosis. *J. Cell Biol.* 216, 2565–2580.
- 726 Ferreira, A. P. A., Casamento, A., Roas, S. C., Halff, E. F., Panambalana, J., Subramaniam, S.,  
727 Schützenhofer, K., Hak, L. C. W., McGourty, K., Thalassinou, K., et al. (2021). Cdk5 and  
728 GSK3 $\beta$  inhibit fast endophilin-mediated endocytosis. *Nat. Commun.* 12, 2424.
- 729 Gachet, Y. and Hyams, J. S. (2005). Endocytosis in fission yeast is spatially associated with the  
730 actin cytoskeleton during polarised cell growth and cytokinesis. *J. Cell Sci.* 118, 4231–4242.
- 731 Geiser, J. R., Schott, E. J., Kingsbury, T. J., Cole, N. B., Totis, L. J., Bhattacharyya, G., He, L.  
732 and Hoyt, M. A. (1997). *Saccharomyces cerevisiae* genes required in the absence of the  
733 CIN8-encoded spindle motor act in functionally diverse mitotic pathways. *Mol. Biol. Cell* 8,  
734 1035–1050.
- 735 Geli, M. I. and Riezman, H. (1996). Role of type I myosins in receptor-mediated endocytosis in  
736 yeast. *Science* 272, 533–535.
- 737 Goldstein, A. L. and McCusker, J. H. (1999). Three new dominant drug resistance cassettes for  
738 gene disruption in *Saccharomyces cerevisiae*. *Yeast* 15, 1541–1553.
- 739 Goode, B. L., Eskin, J. A. and Wendland, B. (2015). Actin and Endocytosis in Budding Yeast.  
740 *Genetics* 199, 315–358.

- 741 Goodson, H. V., Anderson, B. L., Warrick, H. M., Pon, L. A. and Spudich, J. A. (1996).  
742 Synthetic lethality screen identifies a novel yeast myosin I gene (*MYO5*): myosin I proteins  
743 are required for polarization of the actin cytoskeleton. *J. Cell Biol.* 133, 1277–1291.
- 744 Howard, J. P., Hutton, J. L., Olson, J. M. and Payne, G. S. (2002). Sla1p serves as the targeting  
745 signal recognition factor for NPF(1,2)D-mediated endocytosis. *J. Cell Biol.* 157, 315–326.
- 746 Howes, M. T., Kirkham, M., Riches, J., Cortese, K., Walser, P. J., Simpson, F., Hill, M. M.,  
747 Jones, A., Lundmark, R., Lindsay, M. R., et al. (2010). Clathrin-independent carriers form a  
748 high capacity endocytic sorting system at the leading edge of migrating cells. *J. Cell Biol.*  
749 190, 675–691.
- 750 Ishikawa, K., Catlett, N. L., Novak, J. L., Tang, F., Nau, J. J. and Weisman, L. S. (2003).  
751 Identification of an organelle-specific myosin V receptor. *J. Cell Biol.* 160, 887–897.
- 752 Jin, Y., Sultana, A., Gandhi, P., Franklin, E., Hamamoto, S., Khan, A. R., Munson, M.,  
753 Schekman, R. and Weisman, L. S. (2011). Myosin V transports secretory vesicles via a Rab  
754 GTPase cascade and interaction with the exocyst complex. *Dev. Cell* 21, 1156–1170.
- 755 Johnston, G. C., Prendergast, J. A. and Singer, R. A. (1991). The *Saccharomyces cerevisiae*  
756 *MYO2* gene encodes an essential myosin for vectorial transport of vesicles. *J. Cell Biol.* 113,  
757 539–551.
- 758 Kahana, J. A., Schlenstedt, G., Evanchuk, D. M., Geiser, J. R., Hoyt, M. A. and Silver, P. A.  
759 (1998). The yeast dynactin complex is involved in partitioning the mitotic spindle between  
760 mother and daughter cells during anaphase B. *Mol. Biol. Cell* 9, 1741–1756.
- 761 Kaksonen, M. and Roux, A. (2018). Mechanisms of clathrin-mediated endocytosis. *Nat. Rev.*  
762 *Mol. Cell Biol.* 19, 313–326.
- 763 Kaksonen, M., Sun, Y. and Drubin, D. G. (2003). A pathway for association of receptors,  
764 adaptors, and actin during endocytic internalization. *Cell* 115, 475–487.
- 765 Kaksonen, M., Toret, C. P. and Drubin, D. G. (2005). A modular design for the clathrin- and  
766 actin-mediated endocytosis machinery. *Cell* 123, 305–320.
- 767 Kanaseki, T. and Kadota, K. (1969). The “Vesicle in a Basket.” *J. Cell Biol.* 42, 202–220.
- 768 Khandelwal, P., Ruiz, W. G. and Apodaca, G. (2010). Compensatory endocytosis in bladder  
769 umbrella cells occurs through an integrin-regulated and RhoA- and dynamin-dependent  
770 pathway. *EMBO J.* 29, 1961–1975.
- 771 Korinek, W. S., Copeland, M. J., Chaudhuri, A. and Chant, J. (2000). Molecular Linkage  
772 Underlying Microtubule Orientation Toward Cortical Sites in Yeast. *Science* 287, 2257–2259.
- 773 Labat-de-Hoz, L. and Alonso, M. A. (2021). Formins in Human Disease. *Cells* 10, 2554.

- 774 Lamaze, C., Dujancourt, A., Baba, T., Lo, C. G., Benmerah, A. and Dautry-Varsat, A. (2001).  
775 Interleukin 2 receptors and detergent-resistant membrane domains define a clathrin-  
776 independent endocytic pathway. *Mol. Cell* 7, 661–671.
- 777 Lee, L., Tirnauer, J. S., Li, J., Schuyler, S. C., Liu, J. Y. and Pellman, D. (2000). Positioning of  
778 the Mitotic Spindle by a Cortical-Microtubule Capture Mechanism. *Science* 287, 2260–2262.
- 779 Lee, W.-L., Oberle, J. R. and Cooper, J. A. (2003). The role of the lissencephaly protein Pac1  
780 during nuclear migration in budding yeast. *J. Cell Biol.* 160, 355–364.
- 781 Lee, W.-L., Kaiser, M. A. and Cooper, J. A. (2005). The offloading model for dynein function. *J.*  
782 *Cell Biol.* 168, 201–207.
- 783 Lewis, M. J., Nichols, B. J., Prescianotto-Baschong, C., Riezman, H. and Pelham, H. R. (2000).  
784 Specific retrieval of the exocytic SNARE Snc1p from early yeast endosomes. *Mol. Biol. Cell*  
785 11, 23–38.
- 786 Li, S.-H., Gutekunst, C.-A., Hersch, S. M. and Li, X.-J. (1998). Interaction of Huntingtin-  
787 Associated Protein with Dynactin p150<sup>Glued</sup>. *J. Neurosci.* 18, 1261–1269.
- 788 Lipatova, Z., Tokarev, A. A., Jin, Y., Mulholland, J., Weisman, L. S. and Segev, N. (2008).  
789 Direct interaction between a myosin V motor and the Rab GTPases Ypt31/32 is required for  
790 polarized secretion. *Mol. Biol. Cell* 19, 4177–4187.
- 791 Longtine, M. S., III, A. M., Demarini, D. J., Shah, N. G., Wach, A., Brachat, A., Philippsen, P.  
792 and Pringle, J. R. (1998). Additional modules for versatile and economical PCR-based gene  
793 deletion and modification in *Saccharomyces cerevisiae*. *Yeast* 14, 953–961.
- 794 Maldonado-Báez, L., Dores, M. R., Perkins, E. M., Drivas, T. G., Hicke, L. and Wendland, B.  
795 (2008). Interaction between Epsin/Yap180 adaptors and the scaffolds Ede1/Pan1 is required  
796 for endocytosis. *Mol. Biol. Cell* 19, 2936–2948.
- 797 Mayor, S., Parton, R. G. and Donaldson, J. G. (2014). Clathrin-independent pathways of  
798 endocytosis. *Cold Spring Harb. Perspect. Biol.* 6, a016758.
- 799 Miesenböck, G., Angelis, D. A. D. and Rothman, J. E. (1998). Visualizing secretion and synaptic  
800 transmission with pH-sensitive green fluorescent proteins. *Nature* 394, 192–195.
- 801 Miller, R. K. and Rose, M. D. (1998). Kar9p Is a Novel Cortical Protein Required for  
802 Cytoplasmic Microtubule Orientation in Yeast. *J. Cell Biol.* 140, 377–390.
- 803 Miller, R. K., Heller, K. K., Frisèn, L., Wallack, D. L., Loayza, D., Gammie, A. E. and Rose, M.  
804 D. (1998). The Kinesin-related Proteins, Kip2p and Kip3p, Function Differently in Nuclear  
805 Migration in Yeast. *Mol. Biol. Cell* 9, 2051–2068.

- 806 Miller, R. K., Cheng, S. C. and Rose, M. D. (2000). Bim1p/Yeb1p mediates the Kar9p-  
807 dependent cortical attachment of cytoplasmic microtubules. *Mol. Biol. Cell* 11, 2949–2959.
- 808 Moore, J. K., D’Silva, S. and Miller, R. K. (2006). The CLIP-170 Homologue Bik1p Promotes  
809 the Phosphorylation and Asymmetric Localization of Kar9p. *Mol. Biol. Cell* 17, 178–191.
- 810 Morris, R. E. and Saelinger, C. B. (1983). Diphtheria toxin does not enter resistant cells by  
811 receptor-mediated endocytosis. *Infect. Immun.* 42, 812–817.
- 812 Newpher, T. M., Smith, R. P., Lemmon, V. and Lemmon, S. K. (2005). In Vivo Dynamics of  
813 Clathrin and Its Adaptor-Dependent Recruitment to the Actin-Based Endocytic Machinery in  
814 Yeast. *Dev. Cell* 9, 87–98.
- 815 Ozaki, K., Tanaka, K., Imamura, H., Hihara, T., Kameyama, T., Nonaka, H., Hirano, H.,  
816 Matsuura, Y. and Takai, Y. (1996). Rom1p and Rom2p are GDP/GTP exchange proteins  
817 (GEPs) for the Rho1p small GTP binding protein in *Saccharomyces cerevisiae*. *EMBO J.* 15,  
818 2196–2207.
- 819 Pashkova, N., Jin, Y., Ramaswamy, S. and Weisman, L. S. (2006). Structural basis for myosin V  
820 discrimination between distinct cargoes. *EMBO J.* 25, 693–700.
- 821 Pearse, B. M. F. (1975). Coated vesicles from pig brain: Purification and biochemical  
822 characterization. *J. Mol. Biol.* 97, 93–98.
- 823 Prosser, D. C. and Wendland, B. (2012). Conserved roles for yeast Rho1 and mammalian RhoA  
824 GTPases in clathrin-independent endocytosis. *Small GTPases* 3, 229–235.
- 825 Prosser, D. C., Whitworth, K. and Wendland, B. (2010). Quantitative analysis of endocytosis  
826 with cytoplasmic pHluorin chimeras. *Traffic* 11, 1141–1150.
- 827 Prosser, D. C., Drivas, T. G., Maldonado-Báez, L. and Wendland, B. (2011). Existence of a  
828 novel clathrin-independent endocytic pathway in yeast that depends on Rho1 and formin. *J.*  
829 *Cell Biol.* 195, 657–671.
- 830 Prosser, D. C., Pannunzio, A. E., Brodsky, J. L., Thorner, J., Wendland, B. and O’Donnell, A. F.  
831 (2015).  $\alpha$ -Arrestins participate in cargo selection for both clathrin-independent and clathrin-  
832 mediated endocytosis. *J. Cell Sci.* 128, 4220–4234.
- 833 Prosser, D. C., Wrasman, K., Woodard, T. K., O’Donnell, A. F. and Wendland, B. (2016).  
834 Applications of pHluorin for Quantitative, Kinetic and High-throughput Analysis of  
835 Endocytosis in Budding Yeast. *J. Vis. Exp.* e54587–e54587.
- 836 Pruyne, D. W., Schott, D. H. and Bretscher, A. (1998). Tropomyosin-containing Actin Cables  
837 Direct the Myo2p-dependent Polarized Delivery of Secretory Vesicles in Budding Yeast. *J.*  
838 *Cell Biol.* 143, 1931–1945.

- 839 Pruyne, D., Evangelista, M., Yang, C., Bi, E., Zigmond, S., Bretscher, A. and Boone, C. (2002).  
840 Role of Formins in Actin Assembly: Nucleation and Barbed-End Association. *Science* 297,  
841 612–615.
- 842 Pruyne, D., Legesse-Miller, A., Gao, L., Dong, Y. and Bretscher, A. (2004). Mechanisms of  
843 Polarized Growth and Organelle Segregation in Yeast. *Annu. Rev. Cell Dev. Biol.* 20, 559–  
844 591.
- 845 Radhakrishna, H., Klausner, R. D. and Donaldson, J. G. (1996). Aluminum fluoride stimulates  
846 surface protrusions in cells overexpressing the ARF6 GTPase. *J. Cell Biol.* 134, 935–947.
- 847 Reider, A. and Wendland, B. (2011). Endocytic adaptors - social networking at the plasma  
848 membrane. *J. Cell Sci.* 124, 1613–1622.
- 849 Reider, A., Barker, S. L., Mishra, S. K., Im, Y. J., ez, L. M.-B. aacute, Hurley, J. H., Traub, L.  
850 M. and Wendland, B. (2009). Syp1 is a conserved endocytic adaptor that contains domains  
851 involved in cargo selection and membrane tubulation. *EMBO J.* 28, 3103–3116.
- 852 Roth, T. F. and Porter, K. R. (1964). Yolk protein uptake in the oocyte of the mosquito *Aedes*  
853 *aegypti*. *L. J. Cell Biol.* 20, 313–332.
- 854 Sabharanjak, S., Sharma, P., Parton, R. G. and Mayor, S. (2002). GPI-anchored proteins are  
855 delivered to recycling endosomes via a distinct Cdc42-regulated, clathrin-independent  
856 pinocytic pathway. *Dev. Cell* 2, 411–423.
- 857 Sagot, I., Klee, S. K. and Pellman, D. (2002). Yeast formins regulate cell polarity by controlling  
858 the assembly of actin cables. *Nat. Cell Biol.* 4, 42–50.
- 859 Sanghavi, P., Lu, S. and Gonsalvez, G. B. (2012). A functional link between localized Oskar,  
860 dynamic microtubules, and endocytosis. *Dev. Biol.* 367, 66–77.
- 861 Sankaranarayanan, S., Angelis, D. D., Rothman, J. E. and Ryan, T. A. (2000). The Use of  
862 pHluorins for Optical Measurements of Presynaptic Activity. *Biophys. J.* 79, 2199–2208.
- 863 Schiestl, R. H. and Gietz, R. D. (1989). High efficiency transformation of intact yeast cells using  
864 single stranded nucleic acids as a carrier. *Curr. Genet.* 16, 339–46.
- 865 Schott, D., Ho, J., Pruyne, D. and Bretscher, A. (1999). The COOH-terminal domain of Myo2p,  
866 a yeast myosin V, has a direct role in secretory vesicle targeting. *J. Cell Biol.* 147, 791–808.
- 867 Schott, D. H., Collions, R. N. and Bretscher, A. (2002). Secretory vesicle transport velocity in  
868 living cells depends on the myosin-V lever arm length. *J. Cell Biol.* 156, 35–40.
- 869 Schwartz, K., Richards, K. and Botstein, D. (1997). BIM1 encodes a microtubule-binding protein  
870 in yeast. *Mol. Biol. Cell* 8, 2677–2691.

- 871 Sharma, D. K., Choudhury, A., Singh, R. D., Wheatley, C. L., Marks, D. L. and Pagano, R. E.  
872 (2002). Glycosphingolipids Internalized via Caveolar-related Endocytosis Rapidly Merge  
873 with the Clathrin Pathway in Early Endosomes and Form Microdomains for Recycling. *J.*  
874 *Biol. Chem.* 278, 7564–7572.
- 875 Sheeman, B., Carvalho, P., Sagot, I., Geiser, J., Kho, D., Hoyt, M. A. and Pellman, D. (2003).  
876 Determinants of *S. cerevisiae* dynein localization and activation: implications for the  
877 mechanism of spindle positioning. *Curr. Biol.* 13, 364–372.
- 878 Soykan, T., Kaempf, N., Sakaba, T., Vollweiter, D., Goerdeler, F., Puchkov, D., Kononenko, N.  
879 L. and Haucke, V. (2017). Synaptic Vesicle Endocytosis Occurs on Multiple Timescales and  
880 Is Mediated by Formin-Dependent Actin Assembly. *Neuron* 93, 854-866.e4.
- 881 Stuchell-Brereton, M. D., Siglin, A., Li, J., Moore, J. K., Ahmed, S., Williams, J. C. and Cooper,  
882 J. A. (2011). Functional interaction between dynein light chain and intermediate chain is  
883 required for mitotic spindle positioning. *Mol. Biol. Cell* 22, 2690–2701.
- 884 Sun, Y., Martin, A. C. and Drubin, D. G. (2006). Endocytic Internalization in Budding Yeast  
885 Requires Coordinated Actin Nucleation and Myosin Motor Activity. *Dev. Cell* 11, 33–46.
- 886 Taylor, M. J., Perrais, D. and Merrifield, C. J. (2011). A High Precision Survey of the Molecular  
887 Dynamics of Mammalian Clathrin-Mediated Endocytosis. *PLoS Biol* 9, e1000604.
- 888 Ungewickell, E., Ungewickell, H., Holstein, S. E. H., Lindner, R., Prasad, K., Barouch, W.,  
889 Martini, B., Greene, L. E. and Eisenberg, E. (1995). Role of auxilin in uncoating clathrin-  
890 coated vesicles. *Nature* 378, 632–635.
- 891 Wang, Y., Zhang, X., Zhang, H., Lu, Y., Huang, H., Dong, X., Chen, J., Dong, J., Yang, X.,  
892 Hang, H., et al. (2012). Coiled-coil networking shapes cell molecular machinery. *Mol. Biol.*  
893 *Cell* 23, 3911–3922.
- 894 Watanabe, S. and Boucrot, E. (2017). Fast and ultrafast endocytosis. *Curr. Opin. Cell Biol.* 47,  
895 64–71.
- 896 Watanabe, S., Liu, Q., Davis, M. W., Hollopeter, G., Thomas, N., Jorgensen, N. B. and  
897 Jorgensen, E. M. (2013a). Ultrafast endocytosis at *Caenorhabditis elegans* neuromuscular  
898 junctions. *Elife* 2, e00723.
- 899 Watanabe, S., Rost, B. R., Camacho-Pérez, M., Davis, M. W., Söhl-Kielczynski, B., Rosenmund,  
900 C. and Jorgensen, E. M. (2013b). Ultrafast endocytosis at mouse hippocampal synapses.  
901 *Nature* 504, 242–247.
- 902 Watts, F. Z., Shiels, G. and Orr, E. (1987). The yeast *MYO1* gene encoding a myosin-like protein  
903 required for cell division. *EMBO J.* 6, 3499–3505.

- 904 Wendland, B., Steece, K. E. and Emr, S. D. (1999). Yeast epsins contain an essential N-terminal  
905 ENTH domain, bind clathrin and are required for endocytosis. *EMBO J.* 18, 4383–4393.
- 906 Yin, H., Pruyne, D., Huffaker, T. C. and Bretscher, A. (2000). Myosin V orientates the mitotic  
907 spindle in yeast. *Nature* 406, 1013–1015.



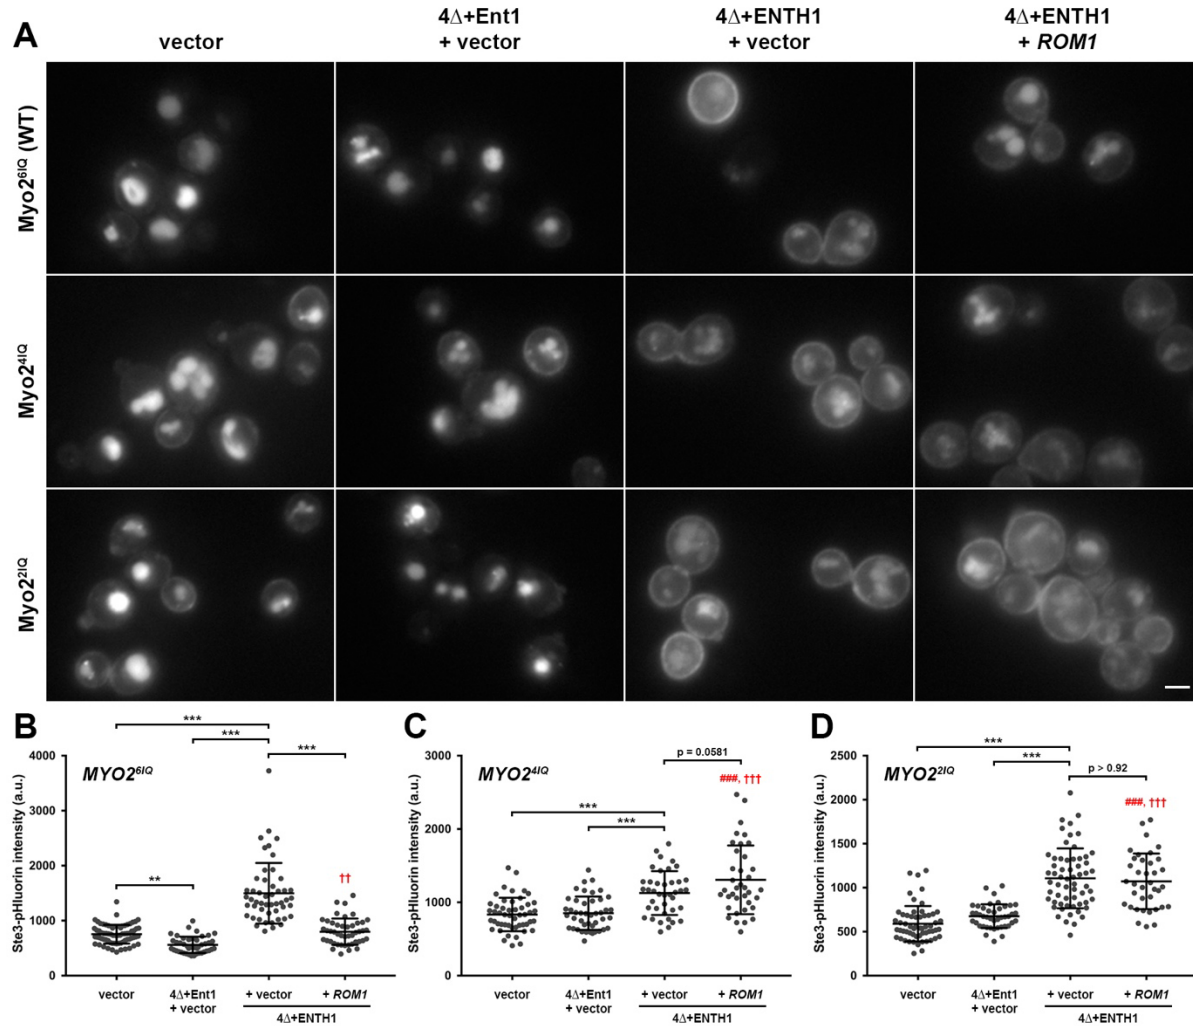

**Figure 1: Effect of Myo2 IQ repeat truncation on clathrin-independent endocytosis.** Full-length Myo2<sup>6IQ</sup> or truncated Myo2<sup>4IQ</sup> or Myo2<sup>2IQ</sup> mutants expressed as the sole source of Myo2 in WT (vector), 4Δ+Ent1 and 4Δ+ENTH1 backgrounds were transformed with vector or high-copy *ROM1* as indicated. (A) Cells expressing Ste3-GFP from the endogenous locus were imaged by fluorescence microscopy. (B-D) Quantification of whole cell fluorescence intensity in cells expressing Ste3-pHluorin transformed as in A. (B) Myo2<sup>6IQ</sup> (n=73, n=45, n=50 and n=46, respectively). (C) Myo2<sup>4IQ</sup> (n=50, n=44, n=40 and n=37, respectively). (D) Myo2<sup>2IQ</sup> (n=58, n=43, n=60 and n=37, respectively). Mean ± s.d.; \*\*\* $P < 0.001$ ; #### $P < 0.001$  compared to WT; †† $P < 0.01$  and ††† $P < 0.001$  compared to 4Δ+Ent1). Scale bar: 2 μm.

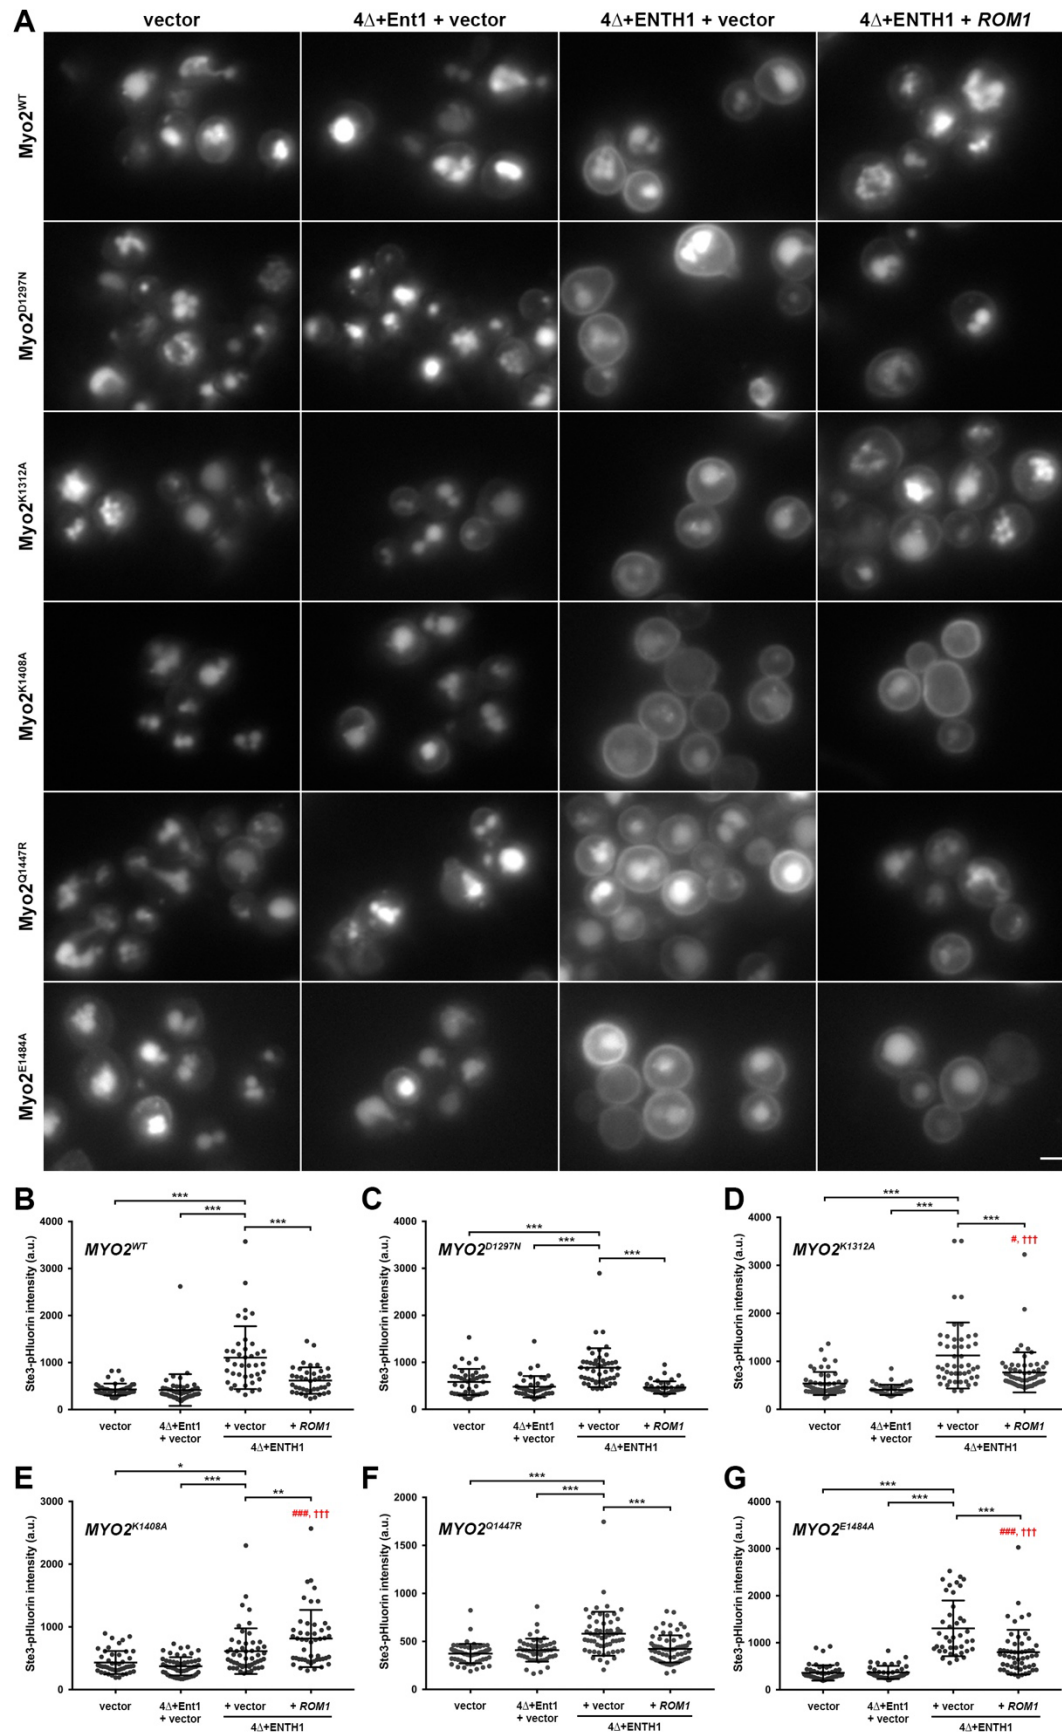

**Figure 2**

**Figure 2: Effect of Myo2 cargo-binding domain mutation on clathrin-independent endocytosis.** Wild-type Myo2 or CBD mutants (D1297N, K1312A, K1408A, Q1447R, and E1484A) expressed as the sole source of Myo2 in WT (vector), 4 $\Delta$ +Ent1 and 4 $\Delta$ +ENTH1 backgrounds were transformed with vector or high-copy *ROM1* as indicated. (A) Cells expressing Ste3-GFP from the endogenous locus were imaged by fluorescence microscopy. (B-G) Quantification of whole cell fluorescence intensity in cells expressing Ste3-pHluorin transformed as in A. (B) Myo2<sup>WT</sup> (n=46, n=52, n=40 and n=40, respectively). (C) Myo2<sup>D1297N</sup> (n=43, n=41, n=49 and n=41, respectively). (D) Myo2<sup>K1312A</sup> (n=53, n=47, n=48 and n=63, respectively). (E) Myo2<sup>K1408A</sup> (n=46, n=55, n=52 and n=48, respectively). (F) Myo2<sup>Q1447R</sup> (n=59, n=52, n=58 and n=65, respectively). (G) Myo2<sup>E1484A</sup> (n=51, n=41, n=41 and n=54, respectively). Mean  $\pm$  s.d.; \* $P$ <0.05, \*\* $P$ <0.01, \*\*\* $P$ <0.001; # $P$ <0.05 and ### $P$ <0.001 compared to WT; ††† $P$ <0.001 compared to 4 $\Delta$ +Ent1). Scale bar: 2  $\mu$ m.

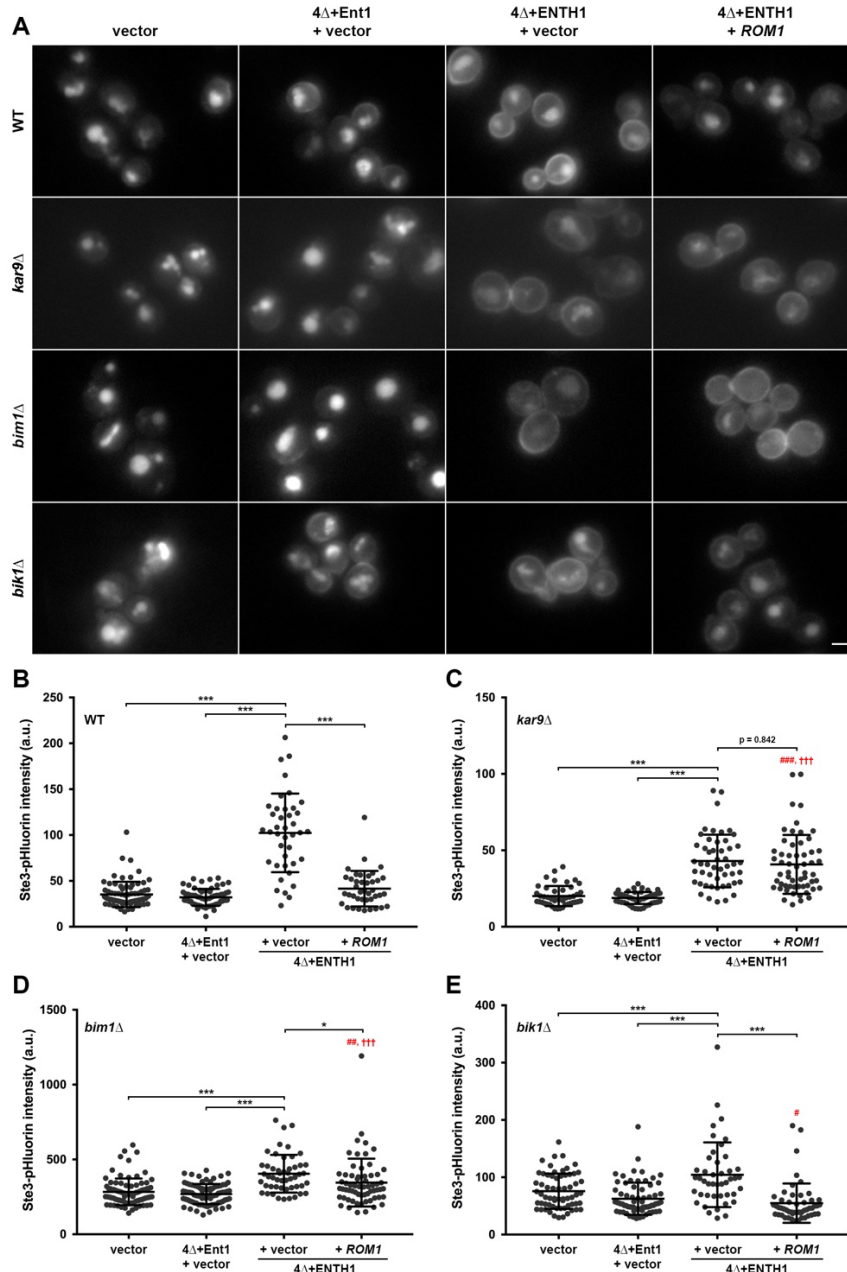

**Figure 3: Requirement for microtubule plus end-binding proteins in clathrin-independent endocytosis.** WT (vector), 4 $\Delta$ +Ent1 and 4 $\Delta$ +ENTH1 backgrounds were transformed with vector or high-copy *ROM1* as indicated. *kar9* $\Delta$ , *bim1* $\Delta$  and *bik1* $\Delta$  were generated in the same strains. (A) Cells expressing Ste3-GFP from the endogenous locus were imaged by fluorescence microscopy. (B-E) Quantification of whole cell fluorescence intensity in cells expressing Ste3-pHluorin transformed as in A. (B) WT, 4 $\Delta$ +Ent1 and 4 $\Delta$ +ENTH1 backgrounds with no additional modifications (n=77, n=65, n=40 and n=40, respectively). (C) *kar9* $\Delta$  (n=45, n=51, n=50 and n=57, respectively). (D) *bim1* $\Delta$  (n=84, n=84, n=50 and n=63, respectively). (E) *bik1* $\Delta$  (n=64, n=70, n=44 and n=52, respectively). Mean  $\pm$  s.d.; \* $P$ <0.05, \*\*\* $P$ <0.001; # $P$ <0.05, ### $P$ <0.01 and ### $P$ <0.001 compared to WT; ††† $P$ <0.001 compared to 4 $\Delta$ +Ent1). Scale bar: 2  $\mu$ m.

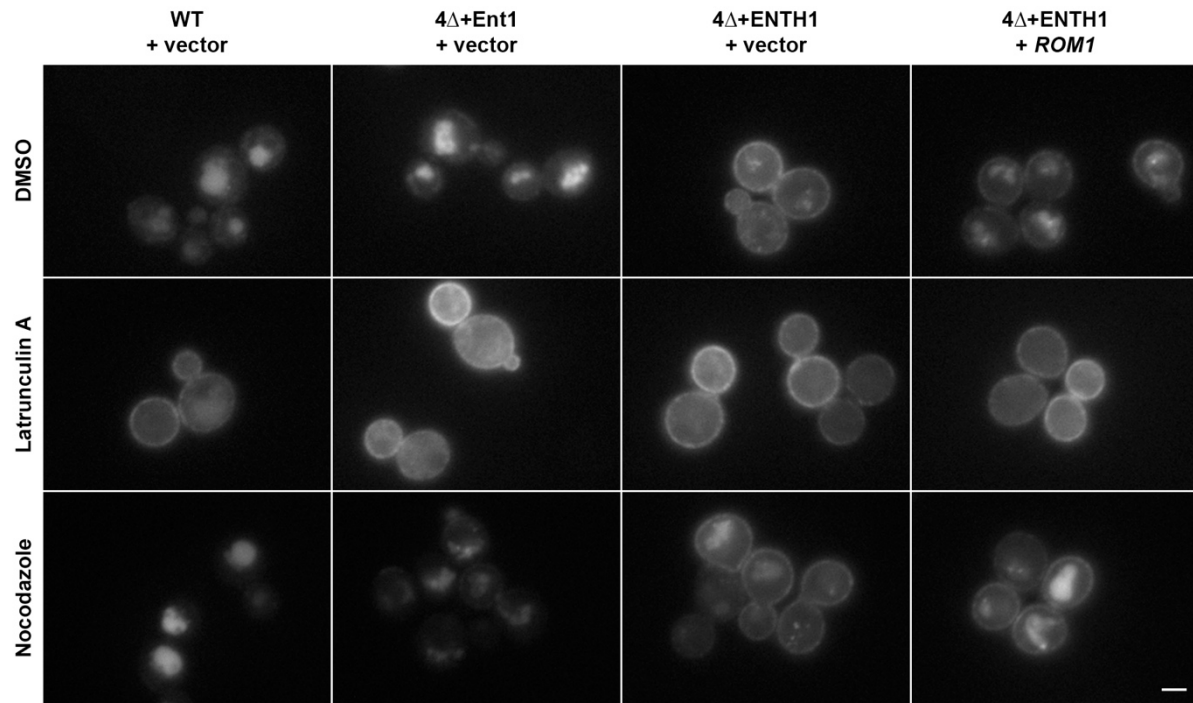

**Figure 4: Requirement for actin and microtubules in clathrin-independent endocytosis.**

WT, 4 $\Delta$ +Ent1 and 4 $\Delta$ +ENTH1 cells expressing Ste3-GFP from the endogenous locus were transformed with vector or high-copy *ROM1* as indicated. Cells grown to mid-logarithmic phase were treated with vehicle (DMSO), 200  $\mu$ M Latrunculin A, or 15  $\mu$ g/ml Nocodazole for 2 h prior to imaging by fluorescence microscopy. Scale bar: 2  $\mu$ m.

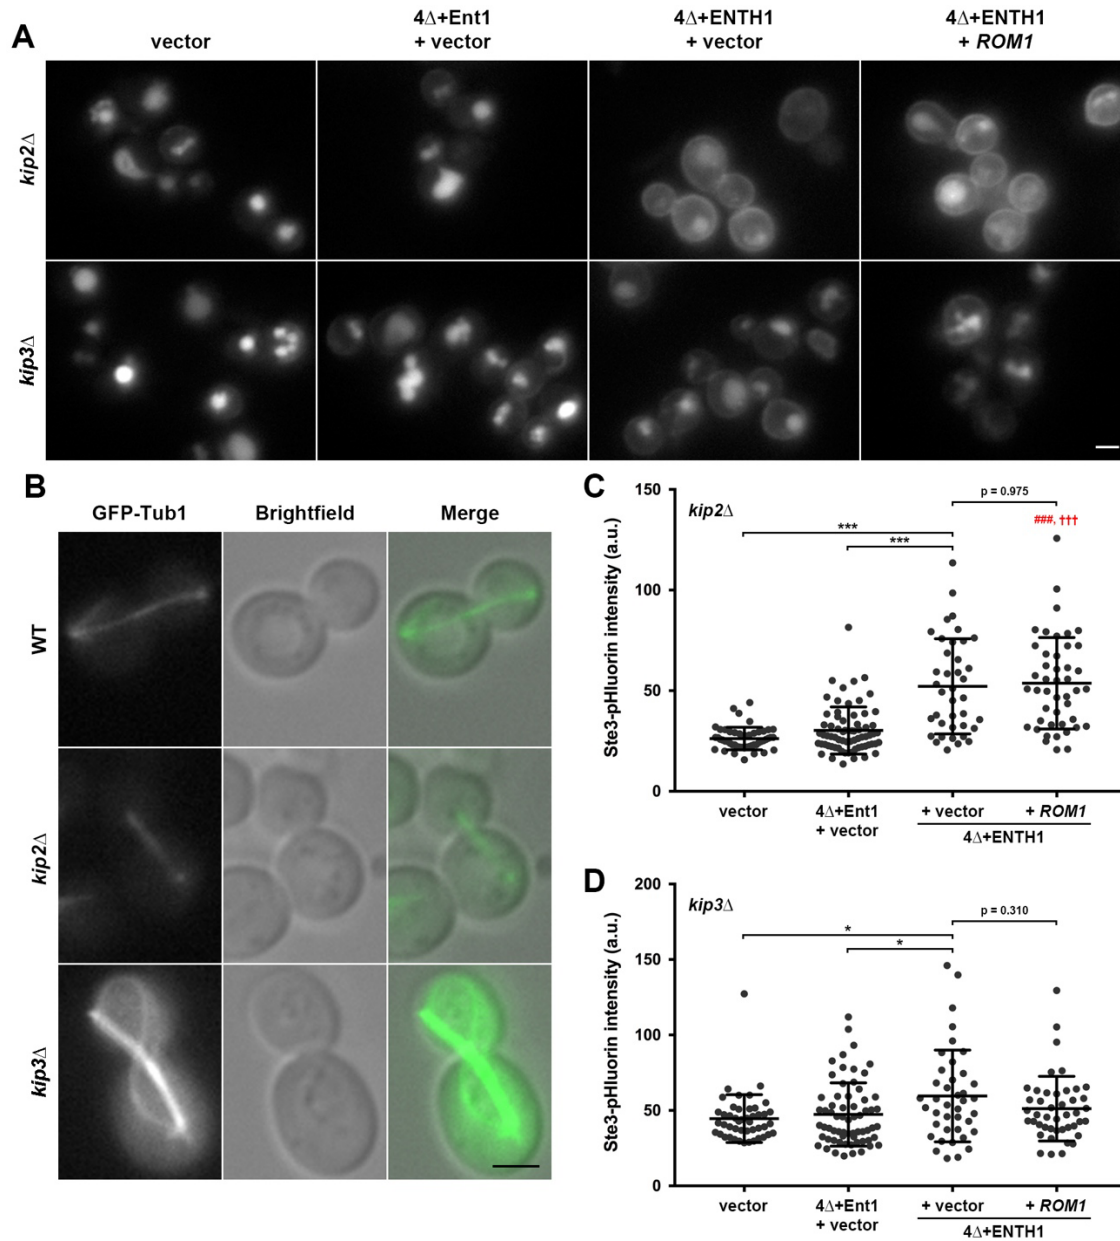

**Figure 5: Role of cytoplasmic microtubule stability in clathrin-independent endocytosis.**

Cytoplasmic microtubule-destabilizing (*kip2* $\Delta$ ) and -stabilizing (*kip3* $\Delta$ ) mutants generated in WT (vector), 4 $\Delta$ +Ent1 and 4 $\Delta$ +ENTH1 backgrounds were transformed with vector or high-copy *ROM1* as indicated. (A) Cells expressing Ste3-GFP from the endogenous locus were imaged by fluorescence microscopy. (B) Fluorescence microscopy of GFP-Tub1 expressed in large-budded WT, *kip2* $\Delta$  and *kip3* $\Delta$  cells, with brightfield and merged panels to demonstrate microtubule localization. (C-D) Quantification of whole cell fluorescence intensity in cells expressing Ste3-pHluorin transformed as in A. (C) *kip2* $\Delta$  (n=49, n=69, n=39 and n=45, respectively). (D) *kip3* $\Delta$  (n=46, n=65, n=40 and n=44, respectively). Mean  $\pm$  s.d.; \* $P$ <0.05, \*\*\* $P$ <0.001; #### $P$ <0.001 compared to WT; ††† $P$ <0.001 compared to 4 $\Delta$ +Ent1). Scale bars: 2  $\mu$ m.

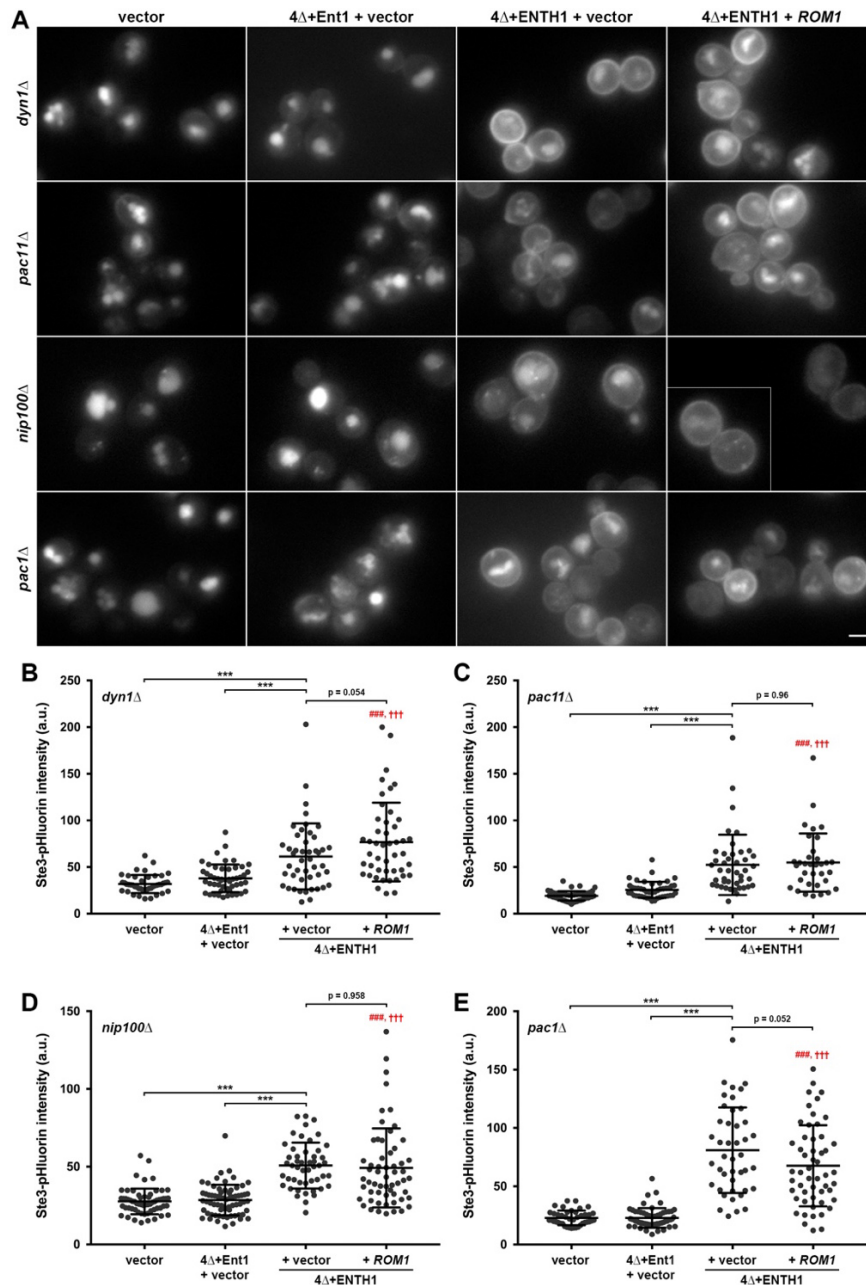

**Figure 6: Requirement for dynein, dynactin, and microtubule plus-end tracking proteins in clathrin-independent endocytosis.** Dynein (*dyn1* $\Delta$  and *pac11* $\Delta$ ), dynactin (*nip100* $\Delta$ ) and plus-end tracking (*pac1* $\Delta$ ) mutants generated in WT (vector), 4 $\Delta$ +Ent1 and 4 $\Delta$ +ENTH1 backgrounds were transformed with vector or high-copy *ROM1* as indicated. (A) Cells expressing Ste3-GFP from the endogenous locus were imaged by fluorescence microscopy. Inset shows an additional cell at the same magnification. (B-E) Quantification of whole cell fluorescence intensity in cells expressing Ste3-pHluorin transformed as in A. (C) *dyn1* $\Delta$  (n=44, n=50, n=46 and n=46, respectively). (D) *pac11* $\Delta$  (n=47, n=45, n=43 and n=34, respectively). (E) *nip100* $\Delta$  (n=61, n=67, n=49 and n=58, respectively). (F) *pac1* $\Delta$  (n=42, n=59, n=43 and n=53, respectively). Mean  $\pm$  s.d.; \*\*\* $P$ <0.001; ### $P$ <0.001 compared to WT; ††† $P$ <0.001 compared to 4 $\Delta$ +Ent1). Scale bar: 2  $\mu$ m.

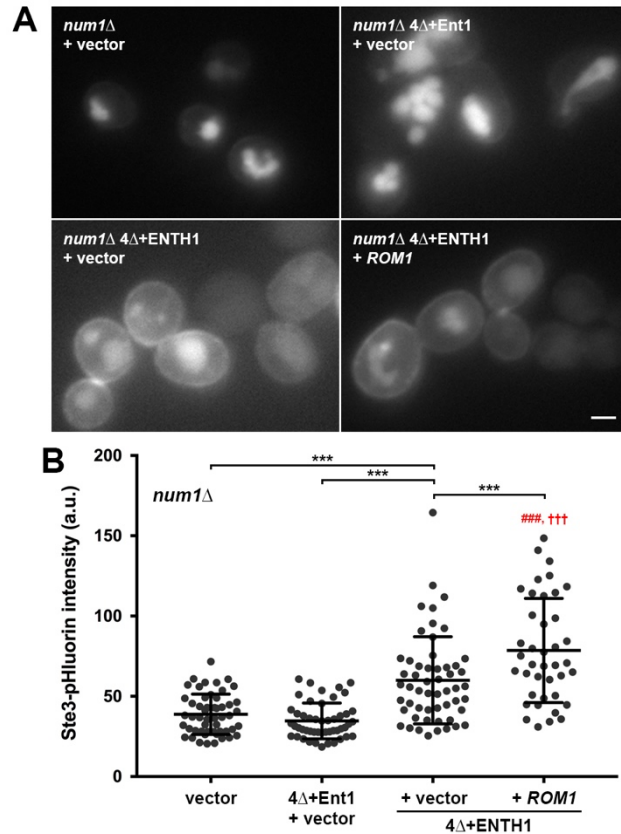

**Figure 7: Requirement for the cortical microtubule capture protein Num1 in clathrin-independent endocytosis.** *num1Δ* in WT (vector), 4Δ+Ent1 and 4Δ+ENTH1 backgrounds were transformed with vector or high-copy *ROM1* as indicated. (A) Cells expressing Ste3-GFP from the endogenous locus were imaged by fluorescence microscopy. (B) Quantification of whole cell fluorescence intensity in cells expressing Ste3-pHluorin transformed as in A (n=52, n=49, n=54 and n=40, respectively). Mean ± s.d.; \*\*\* $P < 0.001$ ; ### $P < 0.001$  compared to WT; ††† $P < 0.001$  compared to 4Δ+Ent1). Scale bar: 2  $\mu$ m.



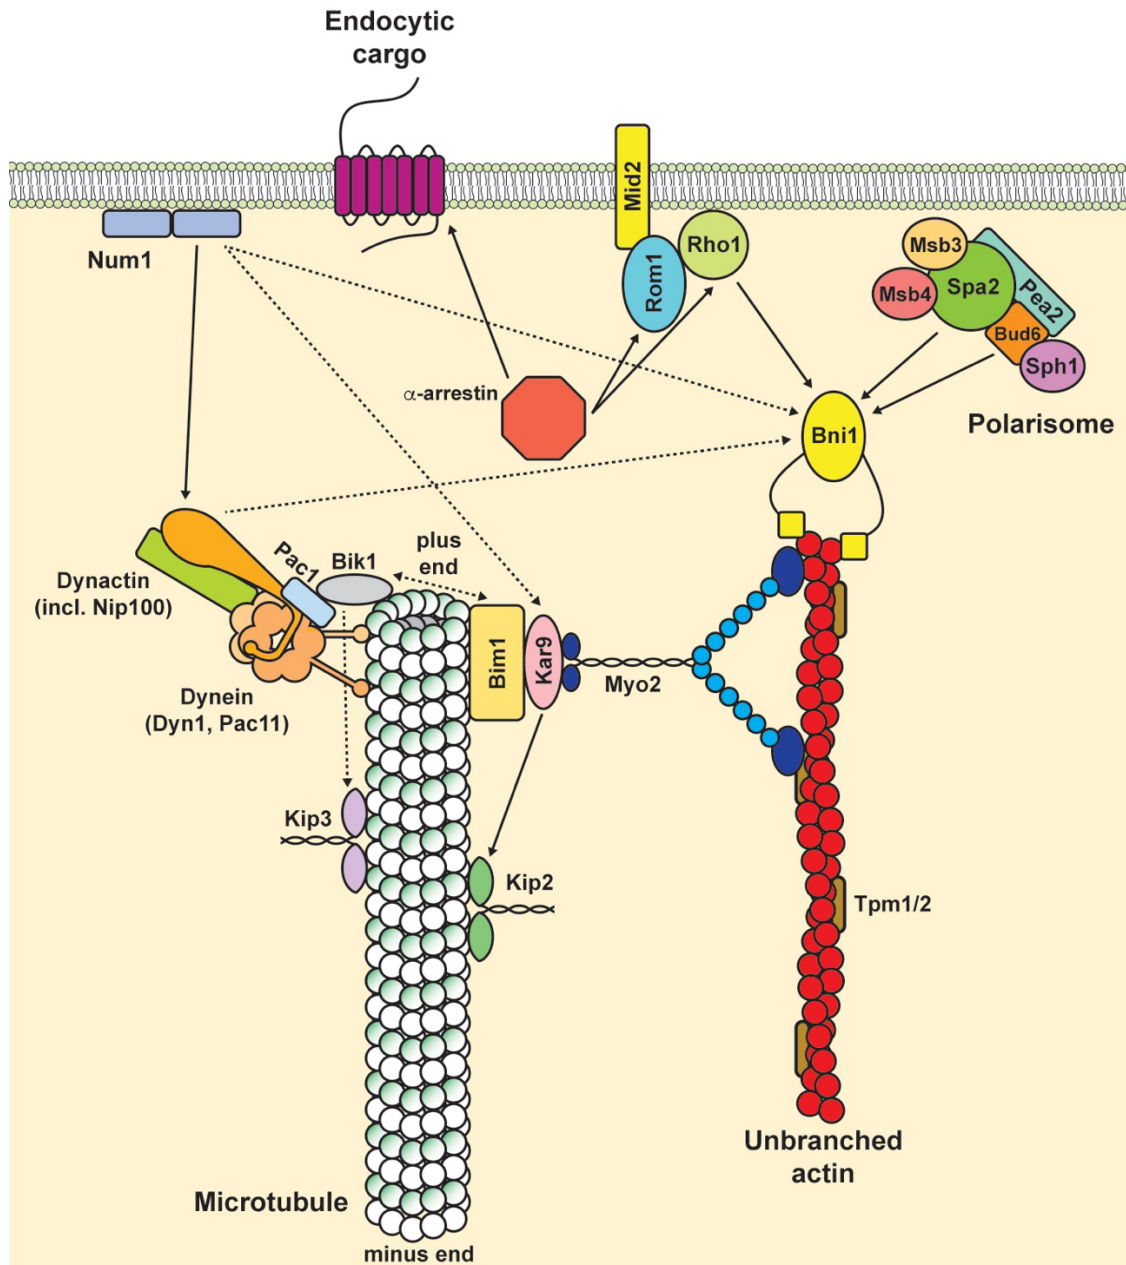

**Figure 8: Model of protein modules involved in yeast clathrin-independent endocytosis.** We previously identified several signaling modules and/or protein transport complexes that play roles in clathrin-independent endocytosis, including a cell wall stress-sensing module (Mid2, Rom1, Rho1), the polarisome (including Bni1, Bud6 and Spa2), unbranched actin filaments stabilized by tropomyosins (Tpm1 and Tpm2; Prosser et al., 2011), and  $\alpha$ -arrestins (Prosser et al., 2015). Here, we add Myo2, proteins involved in microtubule plus-end transport (Kar9 and possibly Bim1), cytoplasmic microtubules and kinesin-related proteins involved in their stability (Kip2 and Kip3), dynein (including Dyn1 and Pac11), dynactin (including Nip100), microtubule plus-end tracking proteins (Pac1), and proteins involved in cortical microtubule capture (Num1) as additional factors that contribute to CIE. To date, none of these additional proteins have defined roles in clathrin-mediated endocytosis.
